# Supplementary material for: Orc4 spatiotemporally stabilizes centromeric chromatin
Source: HighWire-hosted journal article supplement (doi:10.1101/gr.265900.120), 2021-01-29
Supplement: Supplemental_Information.pdf [file Supplemental_Information.pdf]

## Supplemental Information

### Orc4 spatiotemporally stabilizes centromeric chromatin

Lakshmi Sreekumar, Kiran Kumari, Krishnendu Guin, Asif Bakshi, Neha Varshney, Bhagya  
C. Thimmappa, Leelavati Narlikar, Ranjith Padinhateeri, Rahul Siddharthan, Kaustuv  
Sanyal\*

\*Corresponding author

Kaustuv Sanyal  
Molecular Mycology Laboratory  
Molecular Biology & Genetics Unit  
Jawaharlal Nehru Centre for Advanced Scientific Research  
Jakkur, Bangalore – 560064, India  
email: sanyal@jncasr.ac.in (Homepage: <http://www.jncasr.ac.in/sanyal>)  
Telephone: +91-80-2208 2878; Fax: +91-80-2208 2766

This PDF includes:

Supplemental text

Figures S1 to S7

Tables S1 to S8

Legend for Movie S1

Legend for Dataset S1

Supplemental references

Other supplementary materials for the manuscript include:

Movie S1

Dataset S1

## Supplemental Materials and Methods

### *Construction of conditional orc4 mutants*

In order to create a conditional null mutant of *orc4* in *C. albicans*, a deletion cassette was constructed as follows: a 368 bp fragment (Ca21Chr5 480170-479721) upstream to *ORF19.4221* was amplified using the primers ORC4\_13 and ORC4\_14 from the genomic DNA of SC5314 and cloned as a KpnI-XhoI fragment into pSFS2a (Reuss et al. 2004) to create pLSK1. A 490 bp fragment (Ca21Chr5 478025-477535) downstream to *ORF19.4221* was amplified using ORC4\_15 and ORC4\_16 and cloned as a SacII-SacI fragment into pLSK1 to generate pLSK2. pLSK2 was digested using KpnI and SacI, and was used to transform YJB8675 (Joglekar et al. 2008) to obtain the strain CaLS328 (*ORC4/orc4::SAT1*). The marker was recycled to obtain the strain CaLS329 (*ORC4/orc4::FRT*). To inactivate the remaining allele, a construct was generated by amplifying a fragment (Ca21Chr5 479720-479221) of *ORF19.4221* using the primers ORC4\_11 and ORC4\_12 and cloned as a BamHI-PstI fragment in pCaDIS (Care et al. 1999). The resulting plasmid pLSK3 was digested using BglII and was used to transform CaLS329 to obtain independent transformants of the conditional mutant CaLS330, CaLS331 (*MET3prORC4/orc4::FRT*). Similar deletions were performed in SN148 (Noble and Johnson 2005) to obtain the *orc4* conditional mutants CaLS322, CaLS323 and CaLS324. Each of these strains was transformed with the *CSE4-TAP-HIS* cassette (Mitra et al. 2014) to obtain CaLS325, CaLS326 and CaLS327, respectively. The desired transformants were confirmed by PCR and western blot analysis.

### *Construction of conditional mcm2 mutants*

In order to create a conditional null mutant of *mcm2* in *C. albicans*, a deletion cassette was constructed as follows: a 474 bp fragment (Ca21ChrR 857151-856675) upstream to *ORF19.4354* was amplified using the primers MCM2\_13/MCM2\_14 from the genomic DNA of SC5314 and cloned as a KpnI-XhoI fragment in pSFS2a to generate pLSK4. A 468 bp fragment (Ca21ChrR 853962-853494) downstream to *ORF19.4354* was amplified using MCM2\_15 and MCM2\_16 and cloned as a SacII-SacI fragment in pLSK4 to generate pLSK5. The plasmid was digested using KpnI and SacI, and was used to transform YJB8675 (Joglekar et al. 2008) to obtain the strain CaLS309 (*MCM2/mcm2::SAT1*). The marker was recycled to obtain CaLS310 (*MCM2/mcm2::FRT*). To inactivate the remaining allele, a construct was created by amplifying a fragment (Ca21ChrR 856674-856164) of *ORF19.4354*

1 using the primers MCM2\_11 and MCM2\_12 and cloned as a BamHI-PstI fragment in  
2 pCaDIS (47). The resulting plasmid pLSK7 was digested using BglII and was used to  
3 transform CaLS310 to obtain independent transformants of the conditional mutant CaLS311,  
4 CaLS312 and CaLS313 (*MET3prMCM2/mcm2::FRT*). Similar deletions were performed in  
5 the SN148 (Noble and Johnson 2005) to obtain the *mcm2* conditional mutants CaLS303,  
6 CaLS304 and CaLS305. Each of these strains was transformed by the *CSE4-TAP-HIS*  
7 cassette (Mitra et al. 2014) to obtain CaLS306, CaLS307 and CaLS308. Desired  
8 transformants were confirmed by PCR and western blot analyses.

### 9 *Construction of conditional scm3 mutants*

10 In order to create a conditional null mutant of *scm3* in *C. albicans*, a deletion cassette  
11 was constructed as follows: a 598 bp fragment (Ca21Chr3 390264-390708) upstream to  
12 *ORF19.1668* was amplified using the primers ASB25 and ASB26 from the genomic DNA of  
13 SC5314 and cloned as a KpnI-XhoI fragment in pSFS2a to create pASB1. A 305 bp fragment  
14 (Ca21Chr3 387626-388030) downstream to *ORF19.1668* was amplified using the primers  
15 ASB27 and ASB28 and cloned as a SacII-SacI fragment in pASB1 to generate pASB2. The  
16 plasmid was digested using KpnI and SacI and was used to transform *C. albicans* SN148  
17 (Noble and Johnson 2005) to obtain the strain CaASB1 (*SCM3/scm3::SAT1*). The marker  
18 was recycled to obtain CaAB2 (*SCM3/scm3::FRT*). To inactivate the remaining allele, a  
19 construct was generated by amplifying a fragment (Ca21Chr3 389106-390089) of  
20 *ORF19.1668* using the primers ASB34 and ASB35 and cloned as a BamHI-PstI fragment in  
21 pCaDIS (47). The resulting plasmid pAB3 was digested by KpnI and was used to transform  
22 CaAB2 to obtain independent transformants of the *scm3* conditional mutant CaAB3  
23 (*MET3prSCM3/scm3::FRT*). The conditional mutants were further confirmed by PCR.  
24 Similar deletions were performed in the strains YJB8675 (*CSE4-GFP-CSE4*) (Joglekar et al.  
25 2008) and CaKS102 (*CSE4-TAP(URA3)/CSE4*) (Mitra et al. 2014). To construct the  
26 *MET3pr-SCM3* cassette with a *HIS1* marker, a *HIS1* fragment was cloned from pBS-HIS into  
27 the EcoRI site of the plasmid pASB3 to obtain pASB4. The plasmid pASB4 was digested  
28 with KpnI and was used to transform CaAB9 to obtain CaNV52. The conditional mutants  
29 were confirmed by their inability to grow in non-permissive media.

### 30 *Construction of a C-terminal Protein-A tagged strain of Mcm2*

31 The strain CaKS107 (*MCM2/MCM2-TAP*) was constructed by integrating a C-  
32 terminal Protein A tagging cassette with the *NAT* marker created by overlap extension

PCR using the primers M1 to M6 in BWP17 (Wilson et al. 1999). To delete the remaining allele of *MCM2*, the deletion cassette pLSK5 was modified as follows: The *SAT1* marker from pLSK5 was released by digesting with BamHI-PstI and a *URA3* fragment digested with the same enzymes was cloned into this backbone to generate pLSK6. This plasmid was digested using KpnI and SacI and was used to transform CaKS107 to generate CaLS334 (*MCM2-TAP(NAT)/mcm2::URA3*). *URA3* was recycled from this strain to obtain CaLS335, CaLS336 and CaLS337 (*MCM2-TAP(NAT)/mcm2::FRT*). The deletion was confirmed by PCR with primers MCM2\_16 and PJ3 FRTrev, and the expression of the tagged protein was confirmed by western blot using anti-Protein A antibodies. To replace the endogenous promoter of *MCM2* with that of *MET3*, pLSK7 (described previously) was digested with BglII and was used to transform CaLS335, CaLS336 and CaLS337 to generate CaLS338, CaLS339 and CaLS340 (*MET3prMCM2-TAP(NAT)/mcm2::FRT*). The desired transformants were confirmed by their inability to grow in non-permissive media.

#### *Construction of a C-terminal GFP tagged strain of Mcm2*

To tag the endogenous copy of Mcm2 with GFP at the C-terminus, a 487 bp fragment (Ca21ChrR 853966-854452) from *MCM2* ORF was amplified using the primers Mcm2-GFP FP and Mcm2-GFP RP, and cloned as a SacII-SpeI fragment in pBS-GFP-HIS (Chatterjee et al. 2016) to generate pLSK8. The plasmid was digested with PacI and was used to transform SN148 to generate CaLS341 (*MCM2-GFP(HIS1)/MCM2*). The transformants were screened using fluorescence microscopy.

#### *Construction of a C-terminal 2×GFP tagged strain of Scm3*

To tag the endogenous copy of Scm3 with GFP at the C-terminus, a 770 bp fragment (Ca21Chr3 388221- 388991) from *SCM3* ORF was amplified using the primers NV158 and NV159, and cloned as a SacII-SpeI fragment in pBS-GFP-URA3 to obtain pNV31. Another fragment of the *GFP* ORF was amplified using primers NV250 and SR67 and inserted into the SpeI site of pNV31 to obtain pNV32. After confirming the orientation of GFP by HpaI, the plasmid was linearized with SwaI and was used to transform SN148 (Noble and Johnson 2005) to obtain CaNV50 (*SCM3-2×GFP(URA3)/SCM3*). To simultaneously localize Scm3 and Ndc80, we transformed CaNV50 with pNdc80-RFP-ARG4 (Varshney and Sanyal 2019) after digesting it with XhoI to obtain CaNV51 (*SCM3-2×GFP(URA3)/SCM3 NDC80-RFP(ARG4)/NDC80*).



The transformants were screened by microscopy. The remaining copy of *SCM3* was deleted by transforming CaNV51 with pASB2 to generate CaLS342 and CaLS343 (*SCM3-2xGFP(URA3)/scm3::SAT1 NDC80-RFP(ARG4)/NDC80*). Desired transformants were confirmed using PCR with primers ASB41 and PJ3 FRT rev. Localization of Scm3 was confirmed by microscopy. Similarly, YJB8675 was transformed with pNdc80-RFP-*ARG4* to obtain CaLS344 (*CSE4-GFP-CSE4/CSE4 NDC80-RFP(ARG4)/NDC80*).

### *Western blotting*

Approximately 3 O.D. equivalent cells of the relevant *C. albicans* strain were harvested and precipitated by 12.5% TCA overnight at -20°C. The pellet was spun down at 13000 rpm and washed with 80% acetone. The pellet obtained was then dried and resuspended in lysis buffer (1% SDS, 1N NaOH) and SDS loading dye. Samples were boiled for 5 min and electrophoresed on a 10% polyacrylamide gel. Protein transfer was performed by semi-dry method for 30 min at 25V. Following protein transfer, the blot was blocked with 5% skimmed milk for an hour. The blot was incubated with primary antibodies in the following dilutions: rabbit anti-Protein A (1:5000), rabbit anti-Orc4 (1:1000), and mouse anti-PSTAIRES (1: 5000). The blot was washed thrice in PBST (1x PBS + 0.05% Tween) and incubated with goat anti-rabbit IgG-HRP (1:10,000) or goat anti-mouse IgG-HRP (1:10,000). Following three PBST washes, the blot was developed using chemi-luminescence method. For quantifying protein level with respect to PSTAIRES, band intensity of the desired protein was divided with that of PSTAIRES in the corresponding lane and ratio was calculated using densitometric analysis.

### *Flow cytometry*

Cells from the strain CaLS330 were harvested at different time points (as described previously) and processed as described before (Sanyal and Carbon 2002). Prior to injection of the sample into the flow cytometer, the cell suspension was sonicated briefly (30% amplitude, 7s pulse). The sonicated samples were diluted to a desired cell density in 1X PBS and injected into the flow cytometer (BD FACS Aria) for analysis. The output was analyzed using the FLOWJO software.

### *Indirect immuno-fluorescence*

Exponentially grown cultures of SC5314 (*ORC4/ORC4*) and CaLS335 (*MCM2-TAP/mcm2::FRT*) were fixed with 37% formaldehyde. Spheroplasts were prepared using

lysing enzyme and cells were fixed on polyL-lysine coated slides using methanol and acetone and then incubated with 2% skimmed milk to block non-specific binding. Following 10 times washes with PBS, cells were incubated with anti-Orc4 antibodies (1:500) or anti-Protein A antibodies (1:1,000) for 1 h in a humid chamber. Post PBS washes, cells were incubated with Alexa Fluor goat anti-rabbit IgG 568 (1:500) or Alexa Fluor goat anti-rabbit IgG 488 (1:500) for 1 h. The coverslip was mounted on a slide using DAPI (10 ng/μl). Microscopic images were captured by a laser confocal microscope (Zeiss) using LSM 880 META software with He/Ne laser (bandpass 565-615 nm) for Alexa Fluor 568 and a 2-photon laser near IR (bandpass~780 nm) for DAPI. Z-stacks were collected at 0.5 μm intervals and stacked projection images were processed in ImageJ and Adobe Photoshop.

### *Fluorescence microscopy*

For conditional expression of genes under the *MET3* promoter, cells were grown in permissive media overnight and shifted to non-permissive media for the indicated number of hours. In each case, the cells were washed twice with PBS and resuspended in PBS and imaged on a glass slide. DeltaVision System (Applied Precision) was used for CENPA (GFP) localisation upon Scm3 depletion. Zeiss Axio Observer Calibri was used for the localization of Scm3 (GFP) and Mcm2 (GFP), and the localization of CENPA (GFP) upon Mcm2 and Orc4 depletion. To visualize the nuclear mass in CaLS341 (*MCM2-GFP/MCM2*), cells were harvested, washed in PBS and 50 ng/ml of Hoechst was added to the cell suspension before imaging. Images were processed using ImageJ and Adobe Photoshop.

*GFP quantification:* For CENPA (GFP) intensity quantification in *C. albicans*, the *C. albicans* strain CaLS344 (*CSE4-GFP-CSE4/CSE4 NDC80-RFP/NDC80*) was mixed with the *S. cerevisiae* strain JBY254 (*ura3-1::pRS306-112XtetO*) (Wisniewski et al. 2014) and imaged using GFP (488 nm) and RFP (568 nm) channels. Images were taken from multiple fields (n>40) under identical conditions (exposure time = 200 ms and 300 ms for 488 nm and 568 nm, respectively). For quantification of relative GFP intensity, pixel values (arbitrary units) from the background fluorescence were subtracted from the pixel values obtained from the CENPA (GFP) cluster from individual cells. From each field, an unbudded cell of JBY254 was used for the normalization of *C. albicans* cells from the corresponding field. Likewise, 100 cells from each category: G1 (unbudded), S (small budded, with a budding index  $\leq 0.3$ ), metaphase (budding index  $\geq 0.3$ , but unsegregated kinetochore) and anaphase (segregated kinetochore) were considered for analysis. Plots were generated using GraphPad Prism. For

CENPA (GFP) quantification upon HU treatment, similar analysis was performed using treated cells of YJB8675 (*CSE4-GFP-CSE4/CSE4*) and compared to small-budded cells of the control population. The values obtained were plotted in a scatter plot with standard error of mean (SEM). Students' unpaired *t*-test was used to determine statistical significance.

#### *Hi-C analysis*

Wild-type *C. albicans* Hi-C data files were downloaded from PRJNA308106 (Burrack et al. 2016). To examine interactions between the Orc4 binding regions, Hi-C interactions were analyzed according to the chromosome coordinates, different modes identified by DIVERSITY and based on replication timing (*orc*<sup>E</sup>, *orc*<sup>M</sup> and *orc*<sup>L</sup>). The heatmap for the full genome was plotted using log-scaled values with a pseudocount of 0.000001 (10<sup>-6</sup>). The heatmap for the "ORC-only" was plotted using values for the 2 kb windows overlapping with the midpoints of the Orc4 binding regions, using the same scaling and color scale as the full-genome heatmap. The violin plots were calculated for 1,000 randomizations of each dataset, where for each randomization, the chromosomal distribution and lengths of the regions were preserved.

#### *Motif analysis by DIVERSITY*

For motif analysis, the *de novo* motif discovery tool DIVERSITY (Mitra et al. 2018) was used with default web-server options on the 417 Orc4 ChIP-seq peaks. DIVERSITY is specially developed for ChIP-seq experiments profiling proteins that may bind DNA in more than one way.

#### *Replication timing analysis*

To analyze the replication timing of the Orc4 binding regions, fully processed timing data available in GSE17963\_final\_data.txt (Koren et al. 2010) was used. A larger replication time value implies earlier replication timing. All the 414 genomic origins were aligned according to their timing scores, and categorized as early, mid and late replicating regions based on the tertile distribution.

# 1 Supplemental figures:

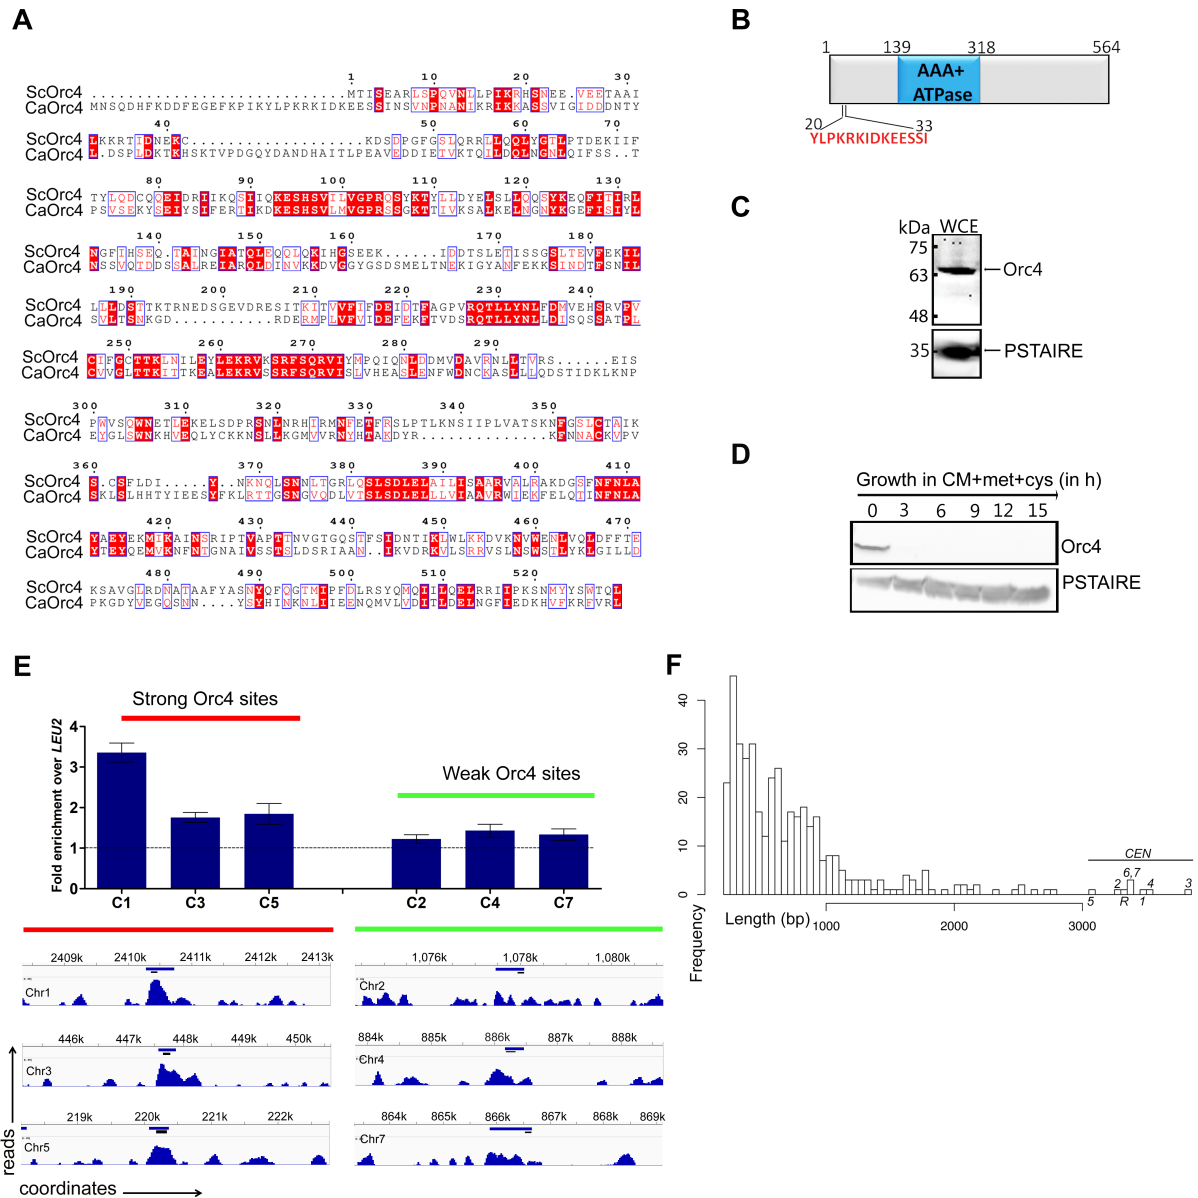

2

3 **Fig. S1. Expression and *in vivo* localization of Orc4 in *C. albicans*.** (A) A pair-wise  
 4 alignment of Orc4 proteins from *S. cerevisiae* and *C. albicans* revealed conserved stretches of  
 5 amino acids constituting the AAA+ ATPase domain (aa 139-318). (B) The domain  
 6 architecture of Orc4 showed a 564 aa-long polypeptide consisting of a central AAA+ ATPase  
 7 domain in *C. albicans*. The peptide sequence chosen to raise the antibodies has been  
 8 highlighted in red letters (aa 20-33). (C) Expression of Orc4 was verified by western blot  
 9 with anti-Orc4 antibodies using the whole cell extract (WCE) from the *C. albicans* strain  
 10 SC5314 (*ORC4/ORC4*). Anti-Orc4 antibodies yielded a band at the expected molecular

weight of ~64 kDa in a denaturing SDS PAGE. PSTAIRE was used as the loading control. (D) Western blot analysis using anti-Orc4 antibodies indicates time course depletion of Orc4 in the conditional mutant CaLS330 (*MET3prORC4/orc4::FRT*) when the strain was grown for the indicated time (0, 3, 6, 9, 12, 15 h) in the presence of 5 mM met + 5 mM cys. PSTAIRE was used as the loading control. (E) Orc4 ChIP-qPCR assays were used to validate the binding of Orc4 in strong (red) and weak (green) enrichment loci with fold enrichment of >1.35 and <1.35, respectively. Fold enrichment values for each primer pair was plotted with respect to *LEU2* (black dashed line). (n=3) The genomic locations of these primer binding site have been depicted as snapshots below, with the blue lines indicating the Orc4 peak and the black lines indicating the PCR amplicon. (F) Frequency distribution of the length of Orc4 binding sites in the *C. albicans* genome.

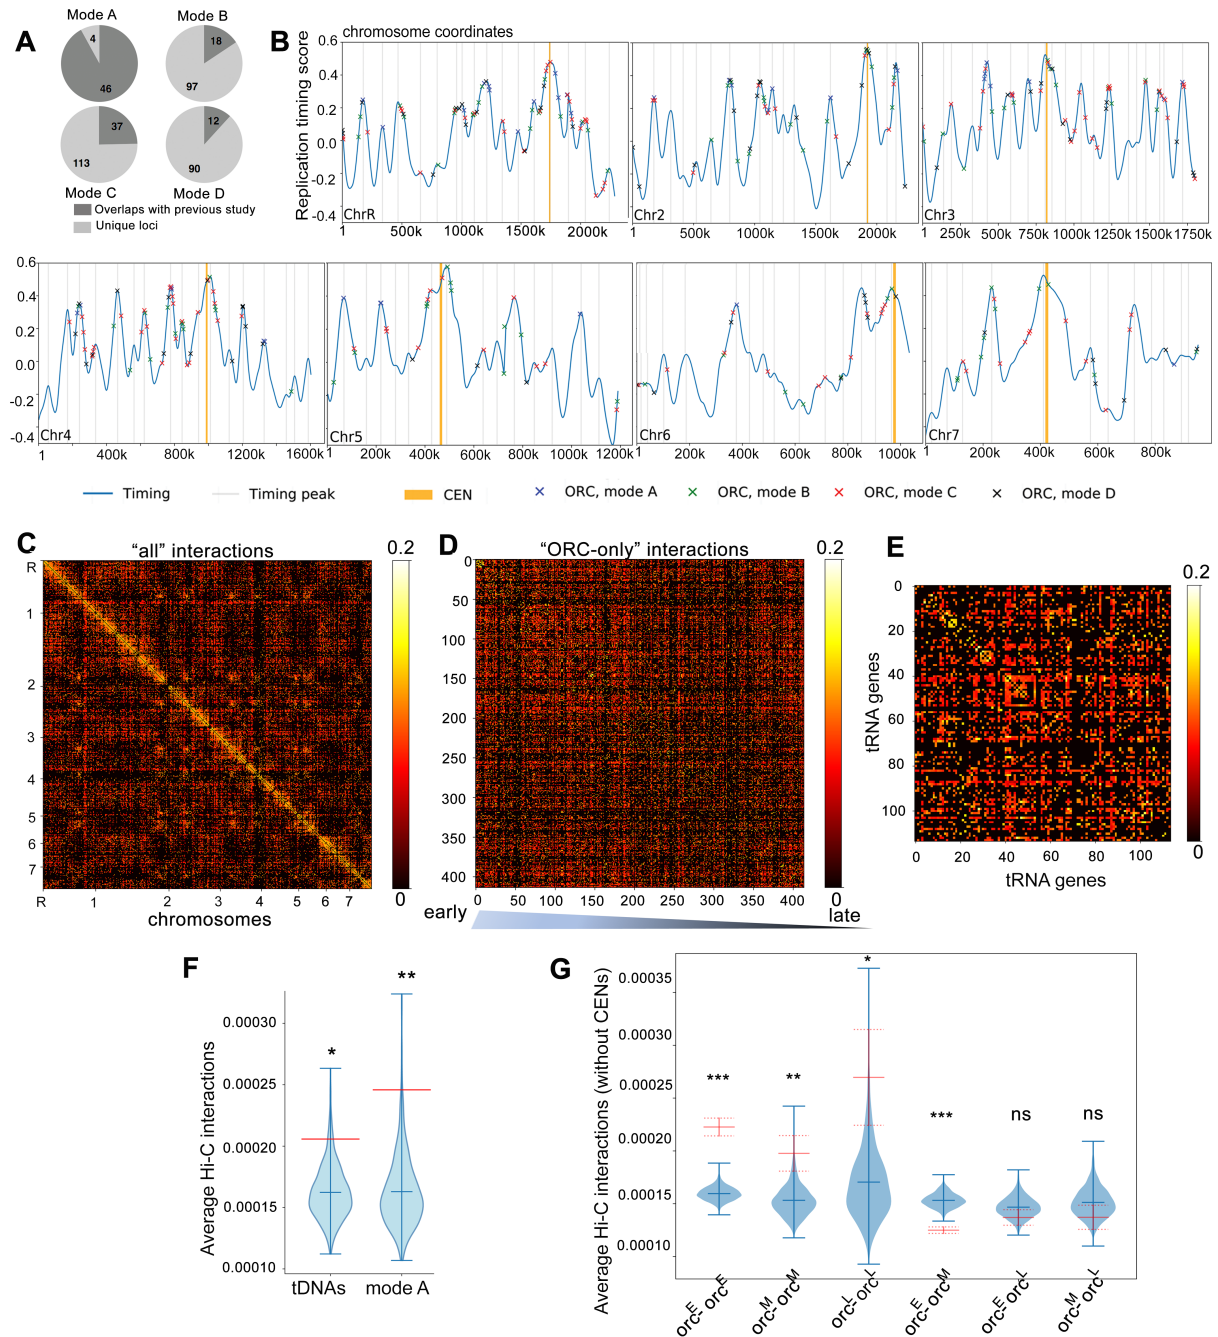

**Fig. S2. Early replicating regions interact among themselves to form an early replication nuclear domain.** (A) Pie charts depicting the number of Orc4 binding sites in the current study overlapping with binding sites reported earlier (Tsai et al. 2014). (B) Orc4 ChIP-seq peaks aligned to the replication timing profile of *C. albicans* chromosomes (Chr2-ChrR) from the previous study (Koren et al. 2010). (C) The Hi-C heatmap shows the whole-genome "all" heatmap representation of the Hi-C data (Burrack et al. 2016) as a 7145 x 7145 matrix with a 2 kb resolution. The maximum value in the data was 0.2015 and the minimum was zero. For plotting, the values were log-transformed with a pseudocount of 0.0001. (D)

1 The Hi-C “ORC-only” heatmap depicted interactions between the chromosomal ORC  
 2 binding regions, ordered by timing (early to late), to the same color scale as in (C). The  
 3 analysis was performed at a resolution of 2 kb. It indicates marginally higher interactions  
 4 within  $orc^E$  (top-left quadrant) and within  $orc^L$  (square on bottom right). (E) Hi-C interactions  
 5 for 62 tRNA-associated Orc4 peaks (1-62) and 64 tRNA genes not overlapping with Orc4  
 6 peaks (63-126). (F) Average Hi-C interactions compared to 1,000 randomizations for the 64  
 7 non-Orc4 tRNA genes and the Orc4 peaks, suggesting tRNA genes in general interact more  
 8 than average, but less than the tRNA genes associated with Orc4 peaks. (G) Mean Hi-C  
 9 interactions (solid red) with standard error (dotted red) within and across each of the three  
 10 timing classes ( $orc^E$ ,  $orc^M$  and  $orc^L$ ) without the centromere peaks. These indicated higher  
 11 interaction values within  $orc^E$  and within  $orc^L$  domains, similar to the pattern observed in Fig.  
 12 2E. Blue violins indicate mean interactions across 1,000 randomizations. (\*\*\*)  $p$ -  
 13 value < 0.0001, \*\*  $p$ -value < 0.001, \*  $p$ -value < 0.01, ns  $p$ -value > 0.5)

14

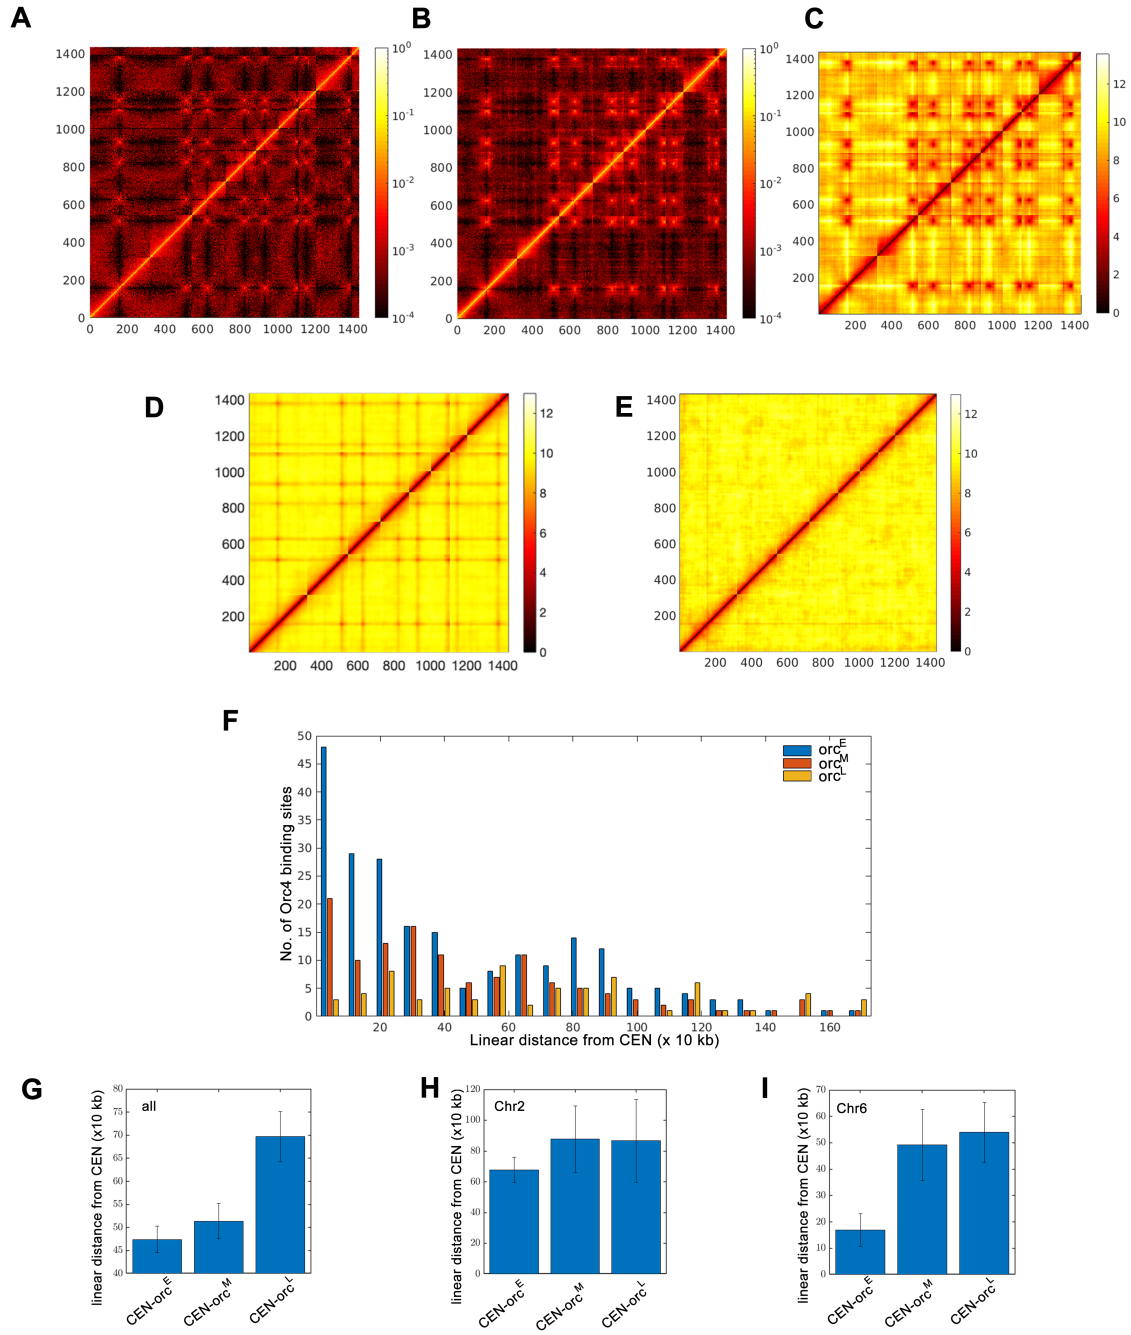

**Fig. S3. Comparison between experimental and simulated Hi-C contact probabilities in *C. albicans*.** (A) The Hi-C heatmap representing the whole genome of *C. albicans* from experimental data reported in the previous study (Burrack et al. 2016) analyzed at a resolution of 10 kb. (B) Heatmap depicting the contact probability calculated from the polymer model of the *C. albicans* genome, at a resolution of 10 kb. (C) Heatmap depicting the average spatial distances between individual beads. (D) Heatmap depicting the average spatial distances between only the Orc4 beads when the SPB tether to the centromere is removed. (E) Heatmap depicting the average spatial distances of a control simulation where



no SPB tethering and no Hi-C contacts were considered. For (A-E), the  $x$  and  $y$  axes represent the bead number along the polymer chain where the spatial distances or contact frequency was computed from the simulation based on the 1,000 independent configurations (F) The linear distance of Orc4 binding sites from centromeres ( $x$ -axis) plotted against the number of Orc4-bound loci reveals that majority of  $orc^E$  are located closest to centromeres. (G-I) The average linear distances between CEN-  $orc^E$ , CEN-  $orc^M$ , and CEN-  $orc^L$  depicts the minimum distance between centromeres and  $orc^E$ . Plots depicting linear distances for all chromosomes (F), Chr2 (G), and Chr6 (H) are shown here. The  $y$ -axis indicates the linear distance between the given set of loci in the simulation. CEN, centromere.

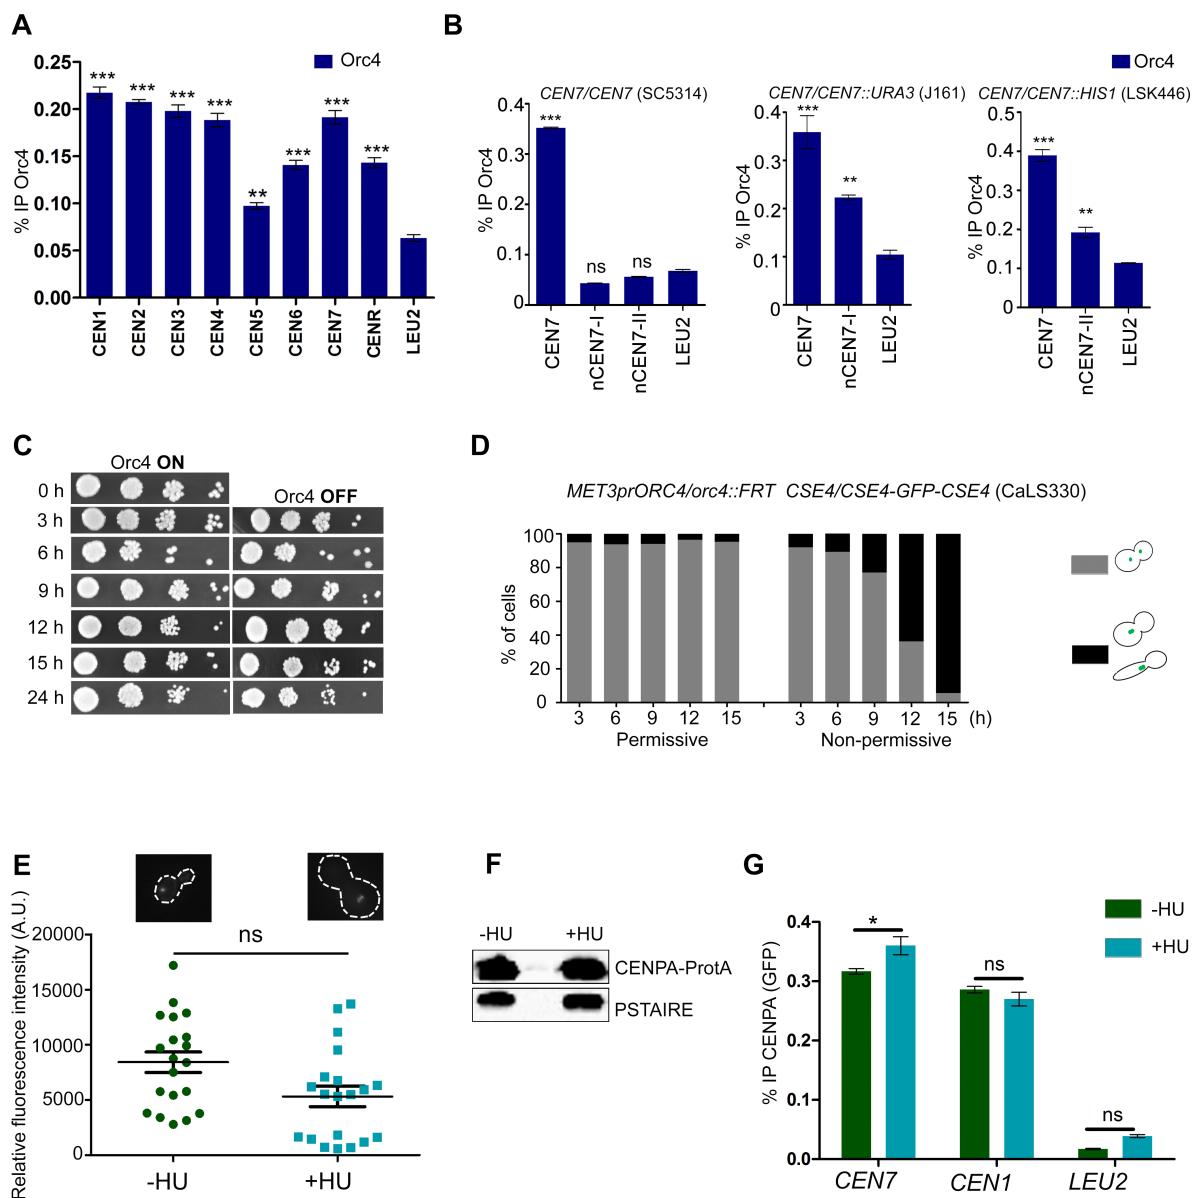

**Fig. S4. Orc4 binds to active centromeres and facilitates kinetochore segregation in *C. albicans*.** (A) Orc4 ChIP-qPCR assays in SC5314 was used to validate the enrichment of Orc4 at all *C. albicans* centromeres. *LEU2* was used as a control non-centromeric locus. (One-way ANOVA, \*\*\*  $p$ -value<0.001, \*\*  $p$ -value <0.01, ns:  $p$ -value >0.05). n=3 (B) Orc4 ChIP-qPCR in the wild type (*CEN7/CEN7*) (left), *CEN7* deletion strain J161 (Thakur and Sanyal 2013) (*CEN7/CEN7::URA3*) (middle) and LSK446 (Sreekumar et al. 2019) (*CEN7/CEN7::HIS1*) (right) indicates significant enrichment of Orc4 at *nCEN7-I* and *nCEN7-II*, the neocentromere hotspots, over the control region (*LEU2*). (One-way ANOVA, \*\*\*  $p$ -value<0.001, \*\*  $p$ -value<0.01, ns:  $p$ -value>0.05). n=2 (C) Spot dilution assays to indicate viability of the *orc4* conditional mutant CaLS330 (*MET3prORC4/orc4::FRT*) grown in permissive or non-permissive media for the indicated time and then spotted on permissive media. Plate photographs were captured after 48 h of incubation at 30°C. (D) The segregation pattern of the kinetochores in large-budded cells was examined in CaLS330 when cells were grown in permissive or non-permissive media for the indicated time. n=100 (E) Normalized fluorescence intensity of cells in YJB8675 (*CSE4-GFP-CSE4/CSE4*) when treated with 200 mM HU for 2 h as compared to untreated cells (Unpaired *t*-test, ns:  $p$ -value>0.05; n=20) (F) Western blot analysis using anti-Protein A antibodies in the strain J200 (*CSE4/CSE4-TAP*) (Thakur and Sanyal 2013) revealed comparable levels of CENPA before (-HU) and after HU treatment (+HU). PSTAIRE was used as a loading control. (G) ChIP-qPCR analysis in YJB8675 using anti-GFP antibodies revealed no depletion of CENPA at centromeres (*CEN7* and *CEN1*) upon HU treatment. (Two-way ANOVA, \*  $p$ -value<0.05, ns:  $p$ -value>0.05; n=3)

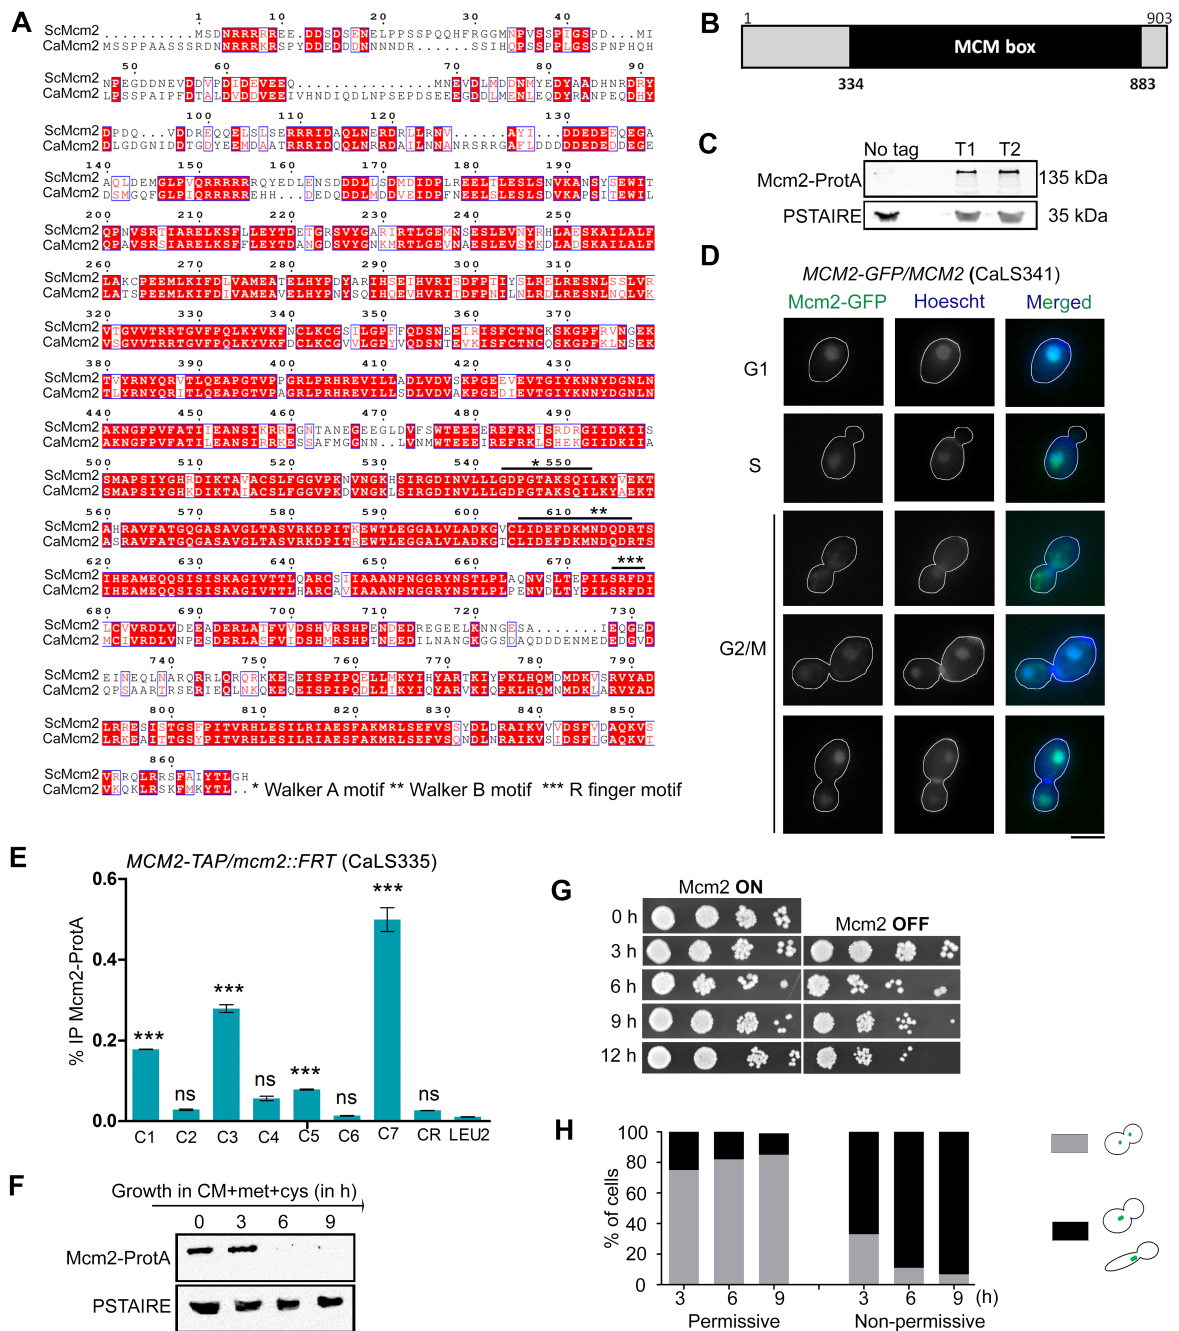

**Fig. S5. Mcm2 is an evolutionarily conserved protein and is important for kinetochore segregation in *C. albicans*** (A) A pair-wise comparison of the Mcm2 proteins from *S. cerevisiae* and *C. albicans* revealed the three conserved motifs, Walker A, Walker B and R finger. (B) Domain architecture of Mcm2 reveals a 903 aa-long polypeptide consisting of the catalytic helicase domain, MCM box (aa 334-883). (C) Western blot analysis of the whole cell extracts of CaLS335 (*MCM2-TAP(NAT)/mcm2::FRT*) using anti-Protein A antibodies displayed a specific band of Mcm2-TAP corresponding to 135 kDa, which was undetected in



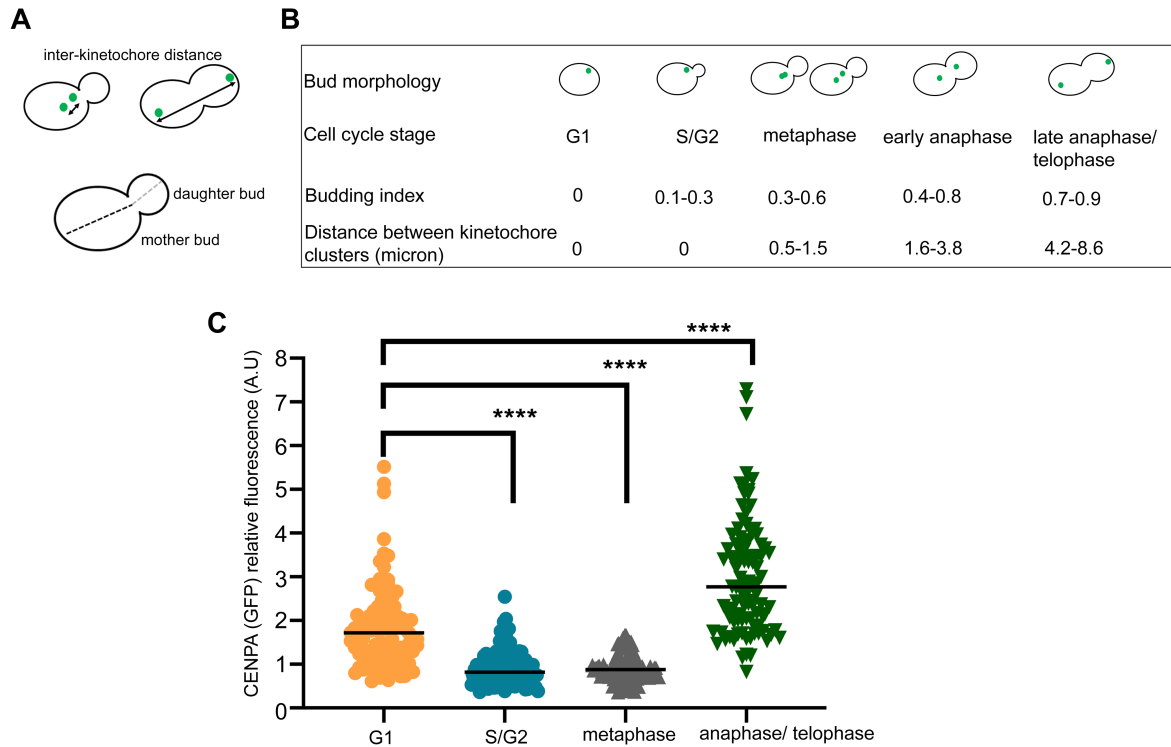

**Fig. S7. Centromeric localization of Scm3 coincides with CENPA loading time in *C.***

***albicans*** (A) Schematic showing calculation for the distance between two kinetochores clusters (green circle) or the inter-kinetochore distance in a metaphase cell and an anaphase cell. The budding index is calculated as the ratio of diameters of a daughter bud (gray dashed line) and its mother bud (black dashed line). (B) Schematic depicting bud morphology and cell cycle stages in *C. albicans* based on budding indices and inter-kinetochore distance calculations described in Fig. S7A. Here, a metaphase cell is considered to have two kinetochore clusters in the same bud, whereas, an anaphase cell is considered to have one kinetochore cluster per bud in a large budded cell. (C) Graphical representation of CENPA (GFP) intensities in a population of cells in various stages of the cell cycle measured using ratiometric analysis (*t*-test, \*\*\*\* *p*-value<0.0005; n=100 for each category).

**Movie S1.** Polymer modeling of *C. albicans* chromosome reveals spatiotemporal localization of Orc4 within the nucleus. The early (red), mid (yellow), and late (blue) replicating Orc4-bound sites have been superimposed on the individual beads (gray) of the coarse-grained polymer generated from the simulation. The movie depicts one of the 1,000 configurations.

**Dataset S1:** Excel file containing all the 417 Orc4 binding sites in *C. albicans* identified by ChIP-sequencing analysis, with their corresponding genomic coordinates, fold enrichment values, *p*- and *q*-values.

**Supplemental table S1. Parameters used in simulation for polymer modeling of chromosomes in *C. albicans***

| Simulation parameter           | Values              |
|--------------------------------|---------------------|
| Number of beads, N             | 1432                |
| Spring stiffness, $k_s$        | $100 k_B T / l_0^2$ |
| Spring stiffness, $k_c$        | $500 k_B T / l_0^2$ |
| Interaction strength, $E_{ij}$ | $1 k_B T / l_0^2$   |
| Natural length $l_0$           | $1 l_0$             |
| Radius of sphere, $R_s$        | $12 l_0$            |

**Supplemental table S2. Chromosomal coordinates representing Orc4 binding regions at centromeres based on *C. albicans* assembly 21**

| Chromosome | CENPA binding region coordinates (length) | Orc4 binding region coordinates (length) |
|------------|-------------------------------------------|------------------------------------------|
| 1          | Ca21Chr1 15662315-1566930 (4616 bp)       | Ca21Chr1 1562748- 1566244 (3497 bp)      |
| 2          | Ca21Chr2 1925206- 1929688 (4483 bp)       | Ca21Chr2 1926183- 1929443 (3261 bp)      |
| 3          | Ca21Chr3 822762-827727 (4966 bp)          | Ca21Chr3 823057- 826863 (3807 bp)        |
| 4          | Ca21Chr4 991382-996030 (4649 bp)          | Ca21Chr4 992010- 995522 (3513 bp)        |
| 5          | Ca21Chr5 4673814-472497 (5114 bp)         | Ca21Chr5 468552- 471618 (3067 bp)        |
| 6          | Ca21Chr6 979686-984007 (4322 bp)          | Ca21Chr6 980541- 983910 (3370 bp)        |
| 7          | Ca21Chr7 425129- 431652 (6524 bp)         | Ca21Chr7 425910- 429297 (3388 bp)        |
| R          | Ca21ChrR 1742833- 1748598 (5766 bp)       | Ca21ChrR 1743951- 1747274 (3324 bp)      |

**Supplemental table S3. Quantification of the relative fluorescence intensity of CENPA (GFP) from photobleaching experiments**

| Cell no. | Pre-bleach intensity (A.U.) | Post-bleach intensity (A.U.) | Max. intensity at recovery (A.U.) | % recovery |
|----------|-----------------------------|------------------------------|-----------------------------------|------------|
| 1        | 16.1                        | 2.03                         | 16.83                             | 105.20     |

|   |        |       |        |       |
|---|--------|-------|--------|-------|
| 2 | 20.68  | 7.814 | 23.823 | 124.4 |
| 3 | 12.949 | 8.955 | 36.708 | 283.4 |
| 4 | 16.96  | 0.586 | 11.11  | 64.27 |
| 5 | 6.083  | 0.421 | 5.309  | 86.32 |
| 6 | 5.023  | 0.263 | 8.232  | 167.4 |

1

## 2 Supplemental table S4. Chemicals and antibodies used in the study

| Reagent                                           | Source                 | Identifier           |
|---------------------------------------------------|------------------------|----------------------|
| Chemicals                                         |                        |                      |
| CaOrc4 peptide                                    | GeneMed Synthesis, USA | Custom synthesized   |
| Freund's complete adjuvant                        | Sigma                  | Cat. no. F5881       |
| Freund's incomplete adjuvant                      | Sigma                  | Cat. no. F5506       |
| 2-mercaptoethanol                                 | HiMedia                | Cat. no. MB041       |
| Hydroxyurea                                       | HiMedia                | Cat no. 6487         |
| Dimethyl sulfoxide (DMSO)                         | Sigma                  | Cat. no. D2650       |
| Nocodazole                                        | Sigma                  | CAS 31430-18-9       |
| Doxycycline hyclate                               | Sigma                  | Cat. no. D9891       |
| Super Signal West Pico chemiluminescent substrate | Thermo Scientific      | Cat. no. 34080       |
| DAPI                                              | Sigma                  | Cat. no. 10236276001 |
| Hoechst                                           | Sigma                  | Cat no. H6024        |
| Lysing enzyme                                     | Sigma                  | Cat. no. L1412       |
| Protein A-Sepharose beads                         | Sigma                  | Cat. no. P3391       |
| Nourseothricin                                    | Werner Bioagents       | CAS 96736-11-7       |
| SensiFast SYBR kit                                | Bioline                | Cat. no. BIO-98020   |
| Antibodies                                        |                        |                      |
| Polyclonal anti-Protein A                         | Sigma                  | Cat. no. P2921       |
| Monoclonal anti-PSTAIRe                           | Abcam                  | Cat. no. 9866        |
| Monoclonal anti-GFP                               | Roche                  | Cat. no. 11814460001 |
| Polyclonal anti-H3                                | Abcam                  | Cat. no. ab1791      |
| Polyclonal anti-H4                                | Abcam                  | Cat. no. ab10158     |
| Goat anti-rabbit IgG-HRP                          | Bangalore Genei        | Cat. no. 105499      |
| Goat anti-mouse IgG-HRP                           | Bangalore Genei        | Cat. no. HP06        |
| Alexa Fluor goat anti-rabbit IgG 568              | Invitrogen             | Cat. no. 11011       |
| Alexa Fluor goat anti-rabbit IgG 488              | ThermoFischer          | Cat no. A27034       |

3

## 4 Supplemental table S5. Strains used in the study

| Name (Description) | Genotype                                                                                                    | Reference                |
|--------------------|-------------------------------------------------------------------------------------------------------------|--------------------------|
| SC5314             | Wild type                                                                                                   | (Aszalos et al. 1968)    |
| BWP17              | <i>Aura3::imm434/Δaura3::imm434,Δhis1::hisG/Δhis1::hisG,Δarg4::hisG/Δarg4::hisG</i>                         | (Wilson et al. 1999)     |
| SN148              | <i>Aura3::imm434/Δaura3::imm434,Δhis1::hisG/Δhis1::hisG,Δarg4::hisG/Δarg4::hisG,Δleu2::hisG/Δleu2::hisG</i> | (Noble and Johnson 2005) |

|                                                                |                                                                                                                                                           |                        |
|----------------------------------------------------------------|-----------------------------------------------------------------------------------------------------------------------------------------------------------|------------------------|
| YJB8675                                                        | <i>Δura3::imm434/Δura3::imm434,Δhis1::hisG/Δhis1::hisG,Δarg4::hisG/Δarg4::hisG, CSE4-GFP-CSE4/CSE4</i>                                                    | (Joglekar et al. 2008) |
| CaLS301 ( <i>MCM2</i> heterozygous null in SN148)              | <i>Δura3::imm434/Δura3::imm434,Δhis1::hisG/Δhis1::hisG,Δarg4::hisG/Δarg4::hisG,Δleu2::hisG/Δleu2::hisG, mcm2::SAT1/MCM2</i>                               | This study             |
| CaLS302 ( <i>MCM2</i> heterozygous null in SN148)              | <i>Δura3::imm434/Δura3::imm434,Δhis1::hisG/Δhis1::hisG,Δarg4::hisG/Δarg4::hisG,Δleu2::hisG/Δleu2::hisG, mcm2::FRT/MCM2</i>                                | This study             |
| CaLS303 ( <i>mcm2</i> conditional mutant in SN148)             | <i>Δura3::imm434/Δura3::imm434,Δhis1::hisG/Δhis1::hisG,Δarg4::hisG/Δarg4::hisG,Δleu2::hisG/Δleu2::hisG MET3pr(URA3)MCM2/mcm2::FRT</i>                     | This study             |
| CaLS304 ( <i>mcm2</i> conditional mutant in SN148)             | <i>Δura3::imm434/Δura3::imm434,Δhis1::hisG/Δhis1::hisG,Δarg4::hisG/Δarg4::hisG,Δleu2::hisG/Δleu2::hisG, MET3pr(URA3)MCM2/mcm2::FRT</i>                    | This study             |
| CaLS305 ( <i>mcm2</i> conditional mutant in SN148)             | <i>Δura3::imm434/Δura3::imm434,Δhis1::hisG/Δhis1::hisG,Δarg4::hisG/Δarg4::hisG,Δleu2::hisG/Δleu2::hisG, MET3pr(URA3)MCM2/mcm2::FRT</i>                    | This study             |
| CaLS306 ( <i>mcm2</i> conditional mutant (SN148) CENPA-Prot A) | <i>Δura3::imm434/Δura3::imm434,Δhis1::hisG/Δhis1::hisG,Δarg4::hisG/Δarg4::hisG,Δleu2::hisG/Δleu2::hisG, MET3pr(URA3)MCM2/mcm2::FRT CSE4-TAP(HIS)/CSE4</i> | This study             |
| CaLS307 ( <i>mcm2</i> conditional mutant (SN148) CENPA-Prot A) | <i>Δura3::imm434/Δura3::imm434,Δhis1::hisG/Δhis1::hisG,Δarg4::hisG/Δarg4::hisG,Δleu2::hisG/Δleu2::hisG, MET3pr(URA3)MCM2/mcm2::FRT CSE4-TAP(HIS)/CSE4</i> | This study             |
| CaLS308 ( <i>mcm2</i> conditional mutant (SN148) CENPA-Prot A) | <i>Δura3::imm434/Δura3::imm434,Δhis1::hisG/Δhis1::hisG,Δarg4::hisG/Δarg4::hisG,Δleu2::hisG/Δleu2::hisG, MET3pr(URA3)MCM2/mcm2::FRT CSE4-TAP(HIS)/CSE4</i> | This study             |
| CaLS309 ( <i>MCM2</i> heterozygous null in 8675)               | <i>Δura3::imm434/Δura3::imm434,Δhis1::hisG/Δhis1::hisG,Δarg4::hisG/Δarg4::hisG, mcm2::SAT1/MCM2 CSE4-GFP-CSE4/CSE4</i>                                    | This study             |
| CaLS310 ( <i>MCM2</i> heterozygous null in 8675)               | <i>Δura3::imm434/Δura3::imm434,Δhis1::hisG/Δhis1::hisG,Δarg4::hisG/Δarg4::hisG, mcm2::FRT/MCM2 CSE4-GFP-CSE4/CSE4</i>                                     | This study             |
| CaLS311 ( <i>mcm2</i> conditional mutant in 8675)              | <i>Δura3::imm434/Δura3::imm434,Δhis1::hisG/Δhis1::hisG,Δarg4::hisG/Δarg4::hisG, MET3pr(URA3)MCM2/mcm2::FRT CSE4-GFP CSE4/CSE4</i>                         | This study             |
| CaLS312 ( <i>mcm2</i> conditional mutant in 8675)              | <i>Δura3::imm434/Δura3::imm434,Δhis1::hisG/Δhis1::hisG,Δarg4::hisG/Δarg4::hisG,</i>                                                                       | This study             |



|                                                                |                                                                                                                                                            |            |
|----------------------------------------------------------------|------------------------------------------------------------------------------------------------------------------------------------------------------------|------------|
|                                                                | <i>MET3pr(URA3)MCM2/mcm2::FRT CSE4-GFP-CSE4/CSE4</i>                                                                                                       |            |
| CaLS313 ( <i>mcm2</i> conditional mutant in 8675)              | <i>Δura3::imm434/Δura3::imm434,Δhis1::hisG/Δhis1::hisG,Δarg4::hisG/Δarg4::hisG, MET3pr(URA3)MCM2/mcm2::FRT CSE4-GFP-CSE4/CSE4</i>                          | This study |
| CaLS320 ( <i>ORC4</i> heterozygous null in SN148)              | <i>Δura3::imm434/Δura3::imm434,Δhis1::hisG/Δhis1::hisG,Δarg4::hisG/Δarg4::hisG, Δleu2::hisG/Δleu2::hisG, orc4::SAT1/ORC4</i>                               | This study |
| CaLS321 ( <i>ORC4</i> heterozygous null in SN148)              | <i>Δura3::imm434/Δura3::imm434,Δhis1::hisG/Δhis1::hisG,Δarg4::hisG/Δarg4::hisG, Δleu2::hisG/Δleu2::hisG, orc4::FRT/ORC4</i>                                | This study |
| CaLS322 ( <i>orc4</i> conditional mutant in SN148)             | <i>Δura3::imm434/Δura3::imm434,Δhis1::hisG/Δhis1::hisG,Δarg4::hisG/Δarg4::hisG, Δleu2::hisG/Δleu2::hisG, MET3prORC4(URA3)/orc4::FRT</i>                    | This study |
| CaLS323 ( <i>orc4</i> conditional mutant in SN148)             | <i>Δura3::imm434/Δura3::imm434,Δhis1::hisG/Δhis1::hisG,Δarg4::hisG/Δarg4::hisG, Δleu2::hisG/Δleu2::hisG, MET3prORC4(URA3)/orc4::FRT</i>                    | This study |
| CaLS324 ( <i>orc4</i> conditional mutant in SN148)             | <i>Δura3::imm434/Δura3::imm434,Δhis1::hisG/Δhis1::hisG,Δarg4::hisG/Δarg4::hisG, Δleu2::hisG/Δleu2::hisG, MET3prORC4(URA3)/orc4::FRT</i>                    | This study |
| CaLS325 ( <i>orc4</i> conditional mutant (SN148) CENPA-Prot A) | <i>Δura3::imm434/Δura3::imm434,Δhis1::hisG/Δhis1::hisG,Δarg4::hisG/Δarg4::hisG, Δleu2::hisG/Δleu2::hisG, MET3prORC4(URA3)/orc4::FRT CSE4 TAP(HIS)/CSE4</i> | This study |
| CaLS326 ( <i>orc4</i> conditional mutant (SN148) CENPA-Prot A) | <i>Δura3::imm434/Δura3::imm434,Δhis1::hisG/Δhis1::hisG,Δarg4::hisG/Δarg4::hisG, Δleu2::hisG/Δleu2::hisG, MET3prORC4(URA3)/orc4::FRT CSE4 TAP(HIS)/CSE4</i> | This study |
| CaLS327 ( <i>orc4</i> conditional mutant (SN148) CENPA-Prot A) | <i>Δura3::imm434/Δura3::imm434,Δhis1::hisG/Δhis1::hisG,Δarg4::hisG/Δarg4::hisG, Δleu2::hisG/Δleu2::hisG, MET3prORC4(URA3)/orc4::FRT CSE4 TAP(HIS)/CSE4</i> | This study |
| CaLS328 ( <i>ORC4</i> heterozygous null in 8675)               | <i>Δura3::imm434/Δura3::imm434,Δhis1::hisG/Δhis1::hisG,Δarg4::hisG/Δarg4::hisG, orc4::SAT1/ORC4 CSE4-GFP-CSE4/CSE4</i>                                     | This study |
| CaLS329 ( <i>ORC4</i> heterozygous null in 8675)               | <i>Δura3::imm434/Δura3::imm434,Δhis1::hisG/Δhis1::hisG,Δarg4::hisG/Δarg4::hisG, orc4::FRT/ORC4 CSE4-GFP-CSE4/CSE4</i>                                      | This study |
| CaLS330 ( <i>orc4</i> conditional mutant in 8675)              | <i>Δura3::imm434/Δura3::imm434,Δhis1::hisG/Δhis1::hisG,Δarg4::hisG/Δarg4::hisG, MET3prORC4(URA3)/orc4::FRT CSE4-GFP-CSE4/CSE4</i>                          | This study |

|                                                   |                                                                                                                                    |                          |
|---------------------------------------------------|------------------------------------------------------------------------------------------------------------------------------------|--------------------------|
| CaLS331 ( <i>orc4</i> conditional mutant in 8675) | <i>Δura3::imm434/Δura3::imm434,Δhis1::hisG/Δhis1::hisG,Δarg4::hisG/Δarg4::hisG, MET3prORC4(URA3)/orc4::FRT CSE4-GFP-CSE4/CSE4</i>  | This study               |
| CaLS332 ( <i>orc4</i> conditional mutant in 8675) | <i>Δura3::imm434/Δura3::imm434,Δhis1::hisG/Δhis1::hisG,Δarg4::hisG/Δarg4::hisG, MET3prORC4(URA3)/orc4::FRT CSE4-GFP-CSE4/CSE4</i>  | This study               |
| CAKS3b ( <i>CENPA</i> under <i>PCK1</i> promoter) | <i>Δura3::imm434/ Δura3::imm434 Δhis1::hisG/ Δhis1::hisG Δarg4::hisG/ Δarg4::hisG CSE4::PCK1prCSE4/ cse4::hisG:URA3:hisG</i>       | (Sanyal and Carbon 2002) |
| LSK446 ( <i>CEN7</i> deletion)                    | <i>Δura3::imm434/Δura3::imm434, Δhis1::hisG/Δhis1::hisG, Δarg4::hisG/Δarg4::hisG, CSE4/CSE4-GFP-CSE4 CEN7/CEN7::HIS1</i>           | (Sreekumar et al. 2019)  |
| J161 ( <i>CEN7</i> deletion)                      | <i>Δura3::imm434/ Δura3::imm434 Δhis1::hisG/ Δhis1::hisG arg4::HIS1/ARG4 CEN7::URA3/ CEN7</i>                                      | (Thakur and Sanyal 2013) |
| J200 ( <i>CENPA</i> -TAP)                         | <i>Δura3::imm434/ Δura3::imm434 Δhis1::hisG/ Δhis1::hisG arg4::HIS1/ARG4 CSE4/CSE4TAP(NAT)</i>                                     | (Thakur and Sanyal 2013) |
| SBC189 ( <i>cdc15</i> mutant)                     | <i>ura3Δ::imm434/ura3Δ::imm434 ade2Δ::hisG/ade2Δ::hisG ENO1/enol1::ENO1-tetR-SchAP4AD-3xHA-ADE2 URA3-TETp-CDC15/cdc15Δ::dpl200</i> | (Bates 2018)             |
| CaKS107 ( <i>Mcm2</i> -TAP)                       | <i>Δura3::imm434/Δura3::imm434,Δhis1::hisG/Δhis1::hisG,Δarg4::hisG/Δarg4::hisG, MCM2-TAP(NAT)/MCM2</i>                             | This study               |
| CaLS334 ( <i>Mcm2</i> -TAP)                       | <i>Δura3::imm434/Δura3::imm434,Δhis1::hisG/Δhis1::hisG,Δarg4::hisG/Δarg4::hisG, MCM2-TAP(NAT)/ mcm2::URA3</i>                      | This study               |
| CaLS335                                           | <i>Δura3::imm434/Δura3::imm434,Δhis1::hisG/Δhis1::hisG,Δarg4::hisG/Δarg4::hisG, MCM2-TAP(NAT)/ mcm2::FRT</i>                       | This study               |
| CaLS336                                           | <i>Δura3::imm434/Δura3::imm434,Δhis1::hisG/Δhis1::hisG,Δarg4::hisG/Δarg4::hisG, MCM2-TAP(NAT)/ mcm2::FRT</i>                       | This study               |
| CaLS337                                           | <i>Δura3::imm434/Δura3::imm434,Δhis1::hisG/Δhis1::hisG,Δarg4::hisG/Δarg4::hisG, MCM2-TAP(NAT)/ mcm2::FRT</i>                       | This study               |
| CaLS338 ( <i>mcm2</i> conditional mutant)         | <i>Δura3::imm434/Δura3::imm434,Δhis1::hisG/Δhis1::hisG,Δarg4::hisG/Δarg4::hisG, MET3pr(URA3)MCM2-TAP(NAT)/ mcm2::FRT</i>           | This study               |
| CaLS339 ( <i>mcm2</i> conditional mutant)         | <i>Δura3::imm434/Δura3::imm434,Δhis1::hisG/Δhis1::hisG,Δarg4::hisG/Δarg4::hisG, MET3pr(URA3)MCM2-TAP(NAT)/mcm2::FRT</i>            | This study               |
| CaLS340 ( <i>mcm2</i> conditional mutant)         | <i>Δura3::imm434/Δura3::imm434,Δhis1::hisG/Δhis1::hisG,Δarg4::hisG/Δarg4::hisG,</i>                                                | This study               |

|                                                        |                                                                                                                                                                |                     |
|--------------------------------------------------------|----------------------------------------------------------------------------------------------------------------------------------------------------------------|---------------------|
|                                                        | <i>MET3pr(URA3)MCM2-TAP(NAT)/mcm2::FRT</i>                                                                                                                     |                     |
| CALS341 ( <i>MCM2-GFP/MCM2</i> )                       | <i>Δura3::imm434/Δura3::imm434,Δhis1::hisG/Δhis1::hisG,Δarg4::hisG/Δarg4::hisG, MCM2-GFP(URA3)/MCM2</i>                                                        | This study          |
| CaAB1( <i>SCM3</i> heterozygous in SN148)              | <i>Δura3::imm434/Δura3::imm434 Δhis1::hisG/Δhis1::hisG Δarg4::hisG/ Δarg4::hisG Δleu2::hisG/ Δleu2::hisG SCM3/scm3::SAT1</i>                                   | This study          |
| CaAB2 ( <i>SCM3</i> heterozygous in SN148)             | <i>Δura3::imm434/Δura3::imm434 Δhis1::hisG/Δhis1::hisG Δarg4::hisG/ Δarg4::hisG Δleu2::hisG/ Δleu2::hisG SCM3/scm3::FRT</i>                                    | This study          |
| CaAB3 ( <i>scm3</i> conditional mutant in SN148)       | <i>Δura3::imm434/Δura3::imm434 Δhis1::hisG/Δhis1::hisG Δarg4::hisG/ Δarg4::hisG Δleu2::hisG/ Δleu2::hisG MET3p(URA3)SCM3/scm3::FRT</i>                         | This study          |
| CaAB4 ( <i>scm3</i> conditional mutant in SN148)       | <i>Δura3::imm434/Δura3::imm434 Δhis1::hisG/Δhis1::hisG Δarg4::hisG/ Δarg4::hisG Δleu2::hisG/ Δleu2::hisG MET3p(URA3)SCM3/scm3::FRT</i>                         | This study          |
| CaAB5 ( <i>SCM3</i> heterozygous in 8675)              | <i>Δura3::imm434/Δura3::imm434,Δhis1::hisG/Δhis1::hisG,Δarg4::hisG/Δarg4::hisG, CSE4/CSE4-GFP-CSE4 scm3::SAT1 /SCM3</i>                                        | This study          |
| CaAB6 ( <i>SCM3</i> heterozygous in 8675)              | <i>Δura3::imm434/Δura3::imm434,Δhis1::hisG/Δhis1::hisG,Δarg4::hisG/Δarg4::hisG, CSE4/CSE4-GFP-CSE4 scm3::FRT/SCM3</i>                                          | This study          |
| CaAB7 ( <i>scm3</i> conditional mutant in 8675)        | <i>Δura3::imm434/Δura3::imm434,Δhis1::hisG/Δhis1::hisG,Δarg4::hisG/Δarg4::hisG, CSE4/CSE4-GFP-CSE4 MET3pSCM3(URA3)/scm3::FRT</i>                               | This study          |
| CaKS102 (CENPA-ProtA)                                  | <i>Δura3::imm434/Δura3::imm434,Δhis1::hisG/Δhis1::hisG,Δarg4::hisG/Δarg4::hisG, Δleu2::hisG/Δleu2::hisG CENP-A/CENP-A-TAP(URA3)</i>                            | (Mitra et al. 2014) |
| CaAB8 ( <i>SCM3</i> heterozygous)                      | <i>Δura3::imm434/Δura3::imm434,Δhis1::hisG/Δhis1::hisG,Δarg4::hisG/Δarg4::hisG, Δleu2::hisG/Δleu2::hisG CENP-A/CENP-A-TAP(URA3) scm3::FRT/SCM3</i>             | This study          |
| CaAB9 ( <i>SCM3</i> heterozygous)                      | <i>Δura3::imm434/Δura3::imm434,Δhis1::hisG/Δhis1::hisG,Δarg4::hisG/Δarg4::hisG, Δleu2::hisG/Δleu2::hisG CENP-A/CENP-A-TAP(URA3) scm3::FRT/SCM3</i>             | This study          |
| CaNV52 ( <i>scm3</i> conditional mutant in Cse4-ProtA) | <i>Δura3::imm434/Δura3::imm434,Δhis1::hisG/Δhis1::hisG,Δarg4::hisG/Δarg4::hisG, Δleu2::hisG/Δleu2::hisG CENP-A/CENP-A-TAP(URA3) MET3pSCM3(HIS1)/ scm3::FRT</i> | This study          |
| CaNV50 ( <i>Scm3-2×GFP</i> )                           | <i>Δura3::imm434/Δura3::imm434 Δhis1::hisG/Δhis1::hisG Δarg4::hisG/ Δarg4::hisG Δleu2::hisG/ Δleu2::hisG SCM3-2×GFP(URA3)/SCM3</i>                             | This study          |

|                                              |                                                                                                                                                             |                          |
|----------------------------------------------|-------------------------------------------------------------------------------------------------------------------------------------------------------------|--------------------------|
| CaNV51 (Scm3-2×GFP/Ndc80-RFP)                | <i>Δura3::imm434/Δura3::imm434 Δhis1::hisG/Δhis1::hisG Δarg4::hisG/Δarg4::hisG Δleu2::hisG/Δleu2::hisG SCM3-2×GFP(URA3)/SCM3 NDC80-RFP(ARG4)/NDC80</i>      | This study               |
| CaLS342 (SCM3-2×GFP/scm3/ Ndc80-RFP)         | <i>Δura3::imm434/Δura3::imm434 Δhis1::hisG/Δhis1::hisG Δarg4::hisG/Δarg4::hisG Δleu2::hisG/Δleu2::hisG SCM3-2×GFP-URA3/scm3::SAT1 NDC80-RFP(ARG4)/NDC80</i> | This study               |
| CaLS343 (SCM3-2×GFP/scm3/ Ndc80-RFP)         | <i>Δura3::imm434/Δura3::imm434 Δhis1::hisG/Δhis1::hisG Δarg4::hisG/Δarg4::hisG Δleu2::hisG/Δleu2::hisG SCM3-2×GFP-URA3/SAT1 NDC80-RFP(ARG4)/NDC80</i>       | This study               |
| CaLS344 (CSE4-GFP-CSE4/CSE4 NDC80-RFP/NDC80) | <i>Δura3::imm434/Δura3::imm434,Δhis1::hisG/Δhis1::hisG,Δarg4::hisG/Δarg4::hisG, CSE4-GFP-CSE4/CSE4 NDC80-RFP(ARG4)/NDC80</i>                                | This study               |
| JB254                                        | <i>MATa ADE2 can1-100 his3-11,15 leu2-3,112::LEU2-Δ80ura3p-TetR-GFP-TAP-ADHtrp1-1 ura3-1::pRS306-112×tetO RAD5</i>                                          | (Wisniewski et al. 2014) |

1

## 2 Supplemental table S6. Plasmids used in the study

| Name            | Description                                                    | Reference                  |
|-----------------|----------------------------------------------------------------|----------------------------|
| pSFS2a          | Recyclable <i>SAT1</i> -flipper cassette                       | (Reuss et al. 2004)        |
| pLSK1           | <i>ORC4</i> upstream sequence cloned in pSFS2a                 | This study                 |
| pLSK2           | Deletion cassette for <i>ORC4</i> in pSFS2a                    | This study                 |
| pCaDIS          | Plasmid for promoter replacement with <i>MET3pr</i>            | (Care et al. 1999)         |
| pLSK3           | <i>ORC4</i> N-terminus cloned in pCaDIS                        | This study                 |
| pLSK4           | <i>MCM2</i> upstream sequence cloned in pSFS2a                 | This study                 |
| pLSK5           | Deletion cassette for <i>MCM2</i> in pSFS2a                    | This study                 |
| pLSK6           | Deletion cassette for <i>MCM2</i> using recyclable <i>URA3</i> |                            |
| pLSK7           | <i>MCM2</i> N-terminus cloned in pCaDIS                        | This study                 |
| pASB1           | <i>SCM3</i> upstream sequence cloned in pSFS2a                 | This study                 |
| pASB2           | Deletion cassette for <i>SCM3</i> in pSFS2a                    | This study                 |
| pASB3           | N-terminus of Scm3 cloned in pCaDIS                            | This study                 |
| pGFP-URA3       | <i>GFP</i> ORF cloned in pBS-URA3                              | (Chatterjee et al. 2016)   |
| pNV31           | GFP tagging plasmid for Scm3                                   | This study                 |
| pNV32           | 2×GFP tagging plasmid for Scm3                                 | This study                 |
| pNdc80-RFP-ARG4 | RFP tagging plasmid for Ndc80                                  | (Varshney and Sanyal 2019) |

3

## 4 Supplemental table S7. Oligonucleotide primers used in the study

| Name | Sequence | Description |
|------|----------|-------------|
|------|----------|-------------|

|               |                                                    |                                                  |
|---------------|----------------------------------------------------|--------------------------------------------------|
| ORC4_13       | CGGGGTACCTTGGTTTGTAAAAATGTTGT<br>TTC               | Deletion cassette<br>for <i>ORC4</i>             |
| ORC4_14       | CCGCTCGAGAAATAGTTTTACTCTTGAGT<br>TAGC              |                                                  |
| ORC4_15       | TCCCCGCGGGTTATAGGTTGCTTTTAGTG<br>C                 |                                                  |
| ORC4_16       | TCCCCGCGGGTTATAGGTTGCTTTTAGTG<br>C                 |                                                  |
| ORC4_11       | CGCGGATCCATGAATTCACAGGACC                          | N-term of Orc4<br>(For <i>MET3pr</i><br>cloning) |
| ORC4_12       | AACTGCAGTGCCATTAACTCTTTAAAGG<br>CG                 |                                                  |
| MCM2_13       | CGGGGTACCCTAATCCCATTTTGTATGA<br>ATAT               | Deletion cassette<br>for <i>MCM2</i>             |
| MCM2_14       | CCGCTCGAGGGTTGATTAAATAGTAATG<br>TAATTAATAAAG       |                                                  |
| MCM2_15       | TCCCCGCGGGTGATTAGTGGGTTATGG                        |                                                  |
| MCM2_16       | CGGAGCTCTGCATTCCAGATTATTTTCTG                      |                                                  |
| MCM2_11       | CGCGGATCCATGTCAAGTCCACCAGCTG                       | N-term of Mcm2<br>(For <i>MET3pr</i><br>cloning) |
| MCM2_12       | AACTGCAGGCGTCTTCATCTTCATCATCG<br>TC                |                                                  |
| M1            | AATTTTATCCAGATTTGATATTATG                          | TAP tagging of<br>Mcm2 by overlap<br>PCR         |
| M2            | TTCCATCTTCTCTTTTCCATCAAAGTATA<br>TTTCATAAATTTACTTC |                                                  |
| M3            | GAAGTAAATTTATGAAATATACTTTGAT<br>GGAAAAGAGAAGATGGAA |                                                  |
| M4            | TACAAACAATAACAATAACTATAACGAT<br>ATCAAGCTTGCCTCGTC  |                                                  |
| M5            | GACGAGGCAAGCTTGATATCGTTATAGT<br>TATTGTTATTGTTTGTA  |                                                  |
| M6            | TTCAAGATATTATAAAAATAGTCGAA                         |                                                  |
| CEN1 CORE RT1 | CAATCTAGCATTTCCTTCACACA                            | qPCR for CEN1                                    |
| CEN1 CORE RT2 | TGACGCAATGAAGTAGGTGAT                              |                                                  |
| CEN2 FP RT    | CTCATTCGGAAGATTATAGTACTTGG                         | qPCR for CEN2                                    |
| CEN2 RP RT    | CATAGTCAATACAATACGTCTTCTG                          |                                                  |
| CEN3 FP RT    | CCTGTGTTGTAAATCAGATCAG                             | qPCR for CEN3                                    |
| CEN3 RP RT    | CATCCCTTGCTCTATCTTATTCAC                           |                                                  |
| CEN4 FP RT    | GCATTAACGTTCTGCTGTTCTTAG                           | qPCR for CEN4                                    |
| CEN4 RP RT    | CTCACCGGAACAGACTGAAC                               |                                                  |
| CACH5F1       | CCCGCAAATAAGCAAACACT                               | qPCR for CEN5                                    |
| CACH5R1       | TTCATGGAAGAGGGGTTTCA                               |                                                  |
| CEN6 FP RT    | CGATTGATCCATCACGATGG                               | qPCR for CEN6                                    |
| CEN6 RP RT    | CTTTTAGTGAGGATGTATGGGATGC                          |                                                  |
| nCEN7-3       | GCATACCTGACACTGTCGTT                               | qPCR for CEN7                                    |
| nCEN7-4       | AACGGTGCTACGTTTTTTTA                               |                                                  |
| CENR FP RT    | GGAGCCGCCTAAAACCTTTG                               | qPCR for CENR                                    |
| CENR RP RT    | CTATTGCCATCCAGGCTG                                 |                                                  |
| 7S14 RTF      | GGATGTTGAGTTCAAAGCCTG                              | qPCR of nCEN7-<br>II<br>(neocen at Chr7)         |
| 7S14 RTR      | CCAGCCAAATAATCTAGCTGC                              |                                                  |

|             |                                  |                                                          |
|-------------|----------------------------------|----------------------------------------------------------|
| 7F2 RT      | ATTAAATAGAATGCGGCAATACC          | qPCR of nCEN7-I<br>(neocen at Chr7)                      |
| 7R2 RT      | ATTTTAAGGATGAGAGGTGTGG           |                                                          |
| C1_FP       | GGCATAGTGAATAATTCTATAAGCAC       | qPCR analysis of strong Orc4 binding regions             |
| C1_RP       | CAAGCTATGTGATTTGACTTAATGAAC      |                                                          |
| C3_FP       | CTACATCGGACTTGTTGTGTC            |                                                          |
| C3-RP       | CATTCTGAAGGTTACAACATATGC         |                                                          |
| C5_FP       | GTGGCGATCACATCGG                 |                                                          |
| C5-RP       | CATAACATTTGCAAGGCAAG             |                                                          |
| C2_FP       | GGCAGCAATATTTGGTGC               |                                                          |
| C2_RP       | GCCAAGAGATACAAATCAAACAAC         |                                                          |
| C4_FP       | CGGGGAATCGAACCCC                 |                                                          |
| C4-RP       | CAAGTCAGCTAATTAGCTCAG            |                                                          |
| C6_FP       | CCTTCTTACGGTGTTGCTG              |                                                          |
| C6_RP       | GTGAGCAAAAGCGTTATATC             |                                                          |
| CR_RP       | GAAAGCAATGACTTCATAACCTTG         |                                                          |
| CR_RP       | CAACAGAAACATGTCAAAGGG            |                                                          |
| C7 mid FP   | CCTCTTCTCCGTCCTTGAC              | qPCR analysis of medium Orc4 binding regions             |
| C7 mid RP   | CAGGTGATGAGCCAGAAC               |                                                          |
| C2 mid FP   | CAGTGGCATAAACTGAATATTCG          |                                                          |
| C2 mid RP   | CAATTACAAC TGGGACCATTG           |                                                          |
| C4 weak FP  | GCAGCAGCACCATTAGG                |                                                          |
| C4 weak RP  | CTTGGAATTTTGCTATGCAAGG           |                                                          |
| nLeu2-1     | GTACCGAAATTGTCAATGAAG            | LEU2 ChIP-qPCR                                           |
| nLeu2-2     | GTGGTGTTTGAAATCAAATTG            |                                                          |
| Non-CEN7a   | ACTCGCCTTCCCCTCCTTTAAATAG        | ChIP PCR at non-CEN7                                     |
| Non-CEN7b   | CCACTACTACGACTGTGGATTCACT        |                                                          |
| ASB25       | AGTGGTACCCAGACGACATCAGGTGTTTC    | Deletion cassette for <i>SCM3</i>                        |
| ASB26       | CAGCTCGAGGCTATGATTTACGGCAAACAC   |                                                          |
| ASB27       | TCCCCGCGGTTATGCGGTTTCTGGAGCAG    |                                                          |
| ASB28       | ATCGAGCTCAATGGCTCAACAAATGATCTTG  |                                                          |
| ASB34       | CGCGGATCCATGAATACCGGTATTGAAATGAT | N-term cloning of <i>SCM3</i> (for <i>MET3</i> promoter) |
| ASB35       | TGCACTGCAGAGATTGATAAGTTTCATCGTCG |                                                          |
| ASB36       | TTGTCACTTTCTTCCTGTTAAC           | Confirmation of <i>MET3pr</i> integration                |
| ASB37       | CTGCTCCAGAAACCGCATAA             |                                                          |
| ASB38       | TCTATTATCCCTCGTGGTCAAG           | confirmation of <i>scm3</i> deletion                     |
| NAT mid F   | TTAGAGACACAAACGAACAATGTACC       |                                                          |
| ASB41       | ATGTGATGAGGCATTACTGAAATC         | confirmation of <i>scm3</i> deletion                     |
| PJ3 FRT rev | CTATTCTCTAGAAAGTATAGGAACTTC      |                                                          |
| NV158       | TCCCCGCGGACTTTCATCTCAAACCTGAGAA  |                                                          |

|       |                                          |                                                  |
|-------|------------------------------------------|--------------------------------------------------|
| NV159 | CGGACTAGTATTGAATAATTCATCTAT<br>TGATTCATA | Construction of<br><i>SCM3-GFP</i><br>cassette   |
| SR67  | CGCACTAGTATGAGTAAGGGAGAAGAAC<br>TTTTCAC  | Construction of<br><i>SCM3-2×GFP</i><br>cassette |
| NV250 | CGCACTAGT TTTGTATAGTTTCATCCAT<br>GCC     |                                                  |

## Supplemental table S8. Software and algorithms used

| Name                        | Source/ Reference                                                                                               |
|-----------------------------|-----------------------------------------------------------------------------------------------------------------|
| Candida Genome Database     | <a href="http://www.candidagenome.org/">http://www.candidagenome.org/</a>                                       |
| Integrative Genomics Viewer | <a href="http://software.broadinstitute.org/software/igv/">http://software.broadinstitute.org/software/igv/</a> |
| ESPrpt 3.0                  | <a href="http://esprpt.ibcp.fr/ESPrpt/ESPrpt/">http://esprpt.ibcp.fr/ESPrpt/ESPrpt/</a>                         |
| MACS2                       | (Feng et al. 2012)                                                                                              |
| Bowtie                      | (Langmead et al. 2009; Langmead and Salzberg 2012)                                                              |
| DIVERSITY                   | (Mitra et al. 2018)                                                                                             |
| HiCUP                       | (Wingett et al. 2015)                                                                                           |
| DryHiC                      | (Vidal et al. 2018)                                                                                             |
| LAMMPS                      | (Plimpton 1995)                                                                                                 |

## Supplemental references

- Aravind L, Iyer LM, Wu C. 2007. Domain architectures of the Scm3p protein provide insights into centromere function and evolution. *Cell Cycle* **6**: 2511-2515.
- Aszalos A, Robison RS, Lemanski P, Berk B. 1968. Trienine, an antitumor triene antibiotic. *J Antibiot (Tokyo)* **21**: 611-615.
- Bates S. 2018. *Candida albicans* Cdc15 is essential for mitotic exit and cytokinesis. *Scientific Reports* **8**: 8899.
- Burrack LS, Hutton HF, Matter KJ, Clancey SA, Liachko I, Plemmons AE, Saha A, Power EA, Turman B, Thevandavakkam MA et al. 2016. Neocentromeres provide chromosome segregation accuracy and centromere clustering to multiple loci along a *Candida albicans* chromosome. *PLoS Genet* **12**: e1006317.
- Care RS, Trevethick J, Binley KM, Sudbery PE. 1999. The *MET3* promoter: a new tool for *Candida albicans* molecular genetics. *Mol Microbiol* **34**: 792-798.
- Chatterjee G, Sankaranarayanan SR, Guin K, Thattikota Y, Padmanabhan S, Siddharthan R, Sanyal K. 2016. Repeat-associated fission yeast-like regional centromeres in the ascomycetous budding yeast *Candida tropicalis*. *PLoS Genet* **12**: e1005839.

- 1 Feng J, Liu T, Qin B, Zhang Y, Liu XS. 2012. Identifying ChIP-seq enrichment using MACS.  
2 *Nat Protoc* **7**: 1728-1740.
- 3 Joglekar AP, Bouck D, Finley K, Liu X, Wan Y, Berman J, He X, Salmon ED, Bloom KS.  
4 2008. Molecular architecture of the kinetochore-microtubule attachment site is  
5 conserved between point and regional centromeres. *J Cell Biol.* **181**: 587-594.
- 6 Koren A, Tsai HJ, Tirosh I, Burrack LS, Barkai N, Berman J. 2010. Epigenetically-inherited  
7 centromere and neocentromere DNA replicates earliest in S-phase. *PLoS Genet* **6**:  
8 e1001068.
- 9 Langmead B, Salzberg SL. 2012. Fast gapped-read alignment with Bowtie 2. *Nat Methods* **9**:  
10 357-359.
- 11 Langmead B, Trapnell C, Pop M, Salzberg SL. 2009. Ultrafast and memory-efficient alignment  
12 of short DNA sequences to the human genome. *Genome Biol* **10**: R25.
- 13 Mitra S, Biswas A, Narlikar L. 2018. DIVERSITY in binding, regulation, and evolution  
14 revealed from high-throughput ChIP. *PLoS Comput Biol* **14**: e1006090.
- 15 Mitra S, Gomez-Raja J, Larriba G, Dubey DD, Sanyal K. 2014. Rad51-Rad52 mediated  
16 maintenance of centromeric chromatin in *Candida albicans*. *PLoS Genet* **10**: e1004344.
- 17 Noble SM, Johnson AD. 2005. Strains and strategies for large-scale gene deletion studies of  
18 the diploid human fungal pathogen *Candida albicans*. *Eukaryot Cell.* **4**: 298-309.
- 19 Plimpton S. 1995. Fast parallel algorithms for short-range molecular dynamics *J Comp Phy.*  
20 **117**: 1-19.
- 21 Reuss O, Vik A, Kolter R, Morschhauser J. 2004. The SAT1 flipper, an optimized tool for gene  
22 disruption in *Candida albicans*. *Gene* **341**: 119-127.
- 23 Sanyal K, Carbon J. 2002. The CENP-A homolog CaCse4p in the pathogenic yeast *Candida*  
24 *albicans* is a centromere protein essential for chromosome transmission. *Proc Natl*  
25 *Acad Sci U S A* **99**: 12969-12974.
- 26 Sreekumar L, Jaitly P, Chen Y, Thimmappa BC, Sanyal A, Sanyal K. 2019. *Cis* and *trans*  
27 chromosomal interactions define pericentric boundaries in the absence of conventional  
28 heterochromatin. *Genetics* **212**: 1121-1132.
- 29 Thakur J, Sanyal K. 2013. Efficient neocentromere formation is suppressed by gene conversion  
30 to maintain centromere function at native physical chromosomal loci in *Candida*  
31 *albicans*. *Genome Res* **23**: 638-652.
- 32 Tsai HJ, Baller JA, Liachko I, Koren A, Burrack LS, Hickman MA, Thevandavakkam MA,  
33 Rusche LN, Berman J. 2014. Origin replication complex binding, nucleosome depletion



patterns, and a primary sequence motif can predict origins of replication in a genome with epigenetic centromeres. *mBio* **5**: e01703-01714.

Varshney N, Sanyal K. 2019. Aurora kinase Ipl1 facilitates bilobed distribution of clustered kinetochores to ensure error-free chromosome segregation in *Candida albicans*. *Mol Microbiol* **112**: 569-587.

Vidal E, le Dily F, Quilez J, Stadhouders R, Cuartero Y, Graf T, Marti-Renom MA, Beato M, Filion GJ. 2018. OneD: increasing reproducibility of Hi-C samples with abnormal karyotypes. *Nucleic Acids Res* **46**: e49.

Wilson RB, Davis D, Mitchell AP. 1999. Rapid hypothesis testing with *Candida albicans* through gene disruption with short homology regions. *J Bacteriol.* **181**: 1868-1874.

Wingett S, Ewels P, Furlan-Magaril M, Nagano T, Schoenfelder S, Fraser P, Andrews S. 2015. HiCUP: pipeline for mapping and processing Hi-C data. *F1000Res* **4**: 1310.

Wisniewski J, Hajj B, Chen J, Mizuguchi G, Xiao H, Wei D, Dahan M, Wu C. 2014. Imaging the fate of histone Cse4 reveals de novo replacement in S phase and subsequent stable residence at centromeres. *eLife* **3**: e02203.
