# Supplementary material for: Orc4 spatiotemporally stabilizes centromeric chromatin
Source: HighWire-hosted journal article supplement (doi:10.1101/gr.265900.120), 2021-01-29
Supplement: Supplemental_Material.xlsx [file Supplemental_Material.xlsx]

## Sheet: C. albicans MACS2 peaks
Dataset S1. All the 417 Orc4 binding sites in C. albicans identified by ChIP-sequencing analysis, with their corresponding genomic coordinates, fold enrichment values, p- and q-values.
chr	start	end	length	pileup	-log10(pvalue)	fold_enrichment	-log10(qvalue)	name
Ca19-mtDNA	8944	9918	975	2835.52	8.43412	1.11283	5.94	broadpeaksPE_peak_1
Ca19-mtDNA	36038	36963	926	2592.76	10.044	1.131	7.3982	C_albicans_MACS2_PE_broad_peak_1
Ca19-mtDNA	37899	38712	814	2018.26	8.01242	1.13175	5.48382	C_albicans_MACS2_PE_broad_peak_2
Ca21chr1_C_albicans_SC5314	276	636	361	497.49	15.5234	1.453	12.674	broadpeaksPE_peak_03
Ca21chr1_C_albicans_SC5314	192315	193450	1136	352.98	5.4713	1.27604	3.16651	broadpeaksPE_peak_04	orf19.6010-P	CDS
Ca21chr1_C_albicans_SC5314	196881	198514	1634	333.15	3.85475	1.22306	1.75299	broadpeaksPE_peak_05	orf19.6009	gene
Ca21chr1_C_albicans_SC5314	241205	241465	261	320.44	4.04802	1.23633	1.91512	broadpeaksPE_peak_06	orf19.3307	gene
Ca21chr1_C_albicans_SC5314	247940	248174	235	308.62	3.39987	1.21399	1.36238	broadpeaksPE_peak_07
Ca21chr1_C_albicans_SC5314	322431	322700	270	308.75	3.41541	1.21448	1.37693	broadpeaksPE_peak_08	orf19.3349-P	CDS
Ca21chr1_C_albicans_SC5314	325974	326856	883	305.39	3.10604	1.20134	1.13155	broadpeaksPE_peak_09	orf19.3352	gene
Ca21chr1_C_albicans_SC5314	329462	330380	919	309.1	3.39666	1.21357	1.36125	broadpeaksPE_peak_10
Ca21chr1_C_albicans_SC5314	341322	342100	779	311.97	3.67935	1.22497	1.59384	broadpeaksPE_peak_11	orf19.3356-P	CDS
Ca21chr1_C_albicans_SC5314	355060	355339	280	311.11	3.6396	1.22376	1.55785	broadpeaksPE_peak_12
Ca21chr1_C_albicans_SC5314	486479	489869	3391	330.28	5.54453	1.28692	3.24588	broadpeaksPE_peak_13	orf19.3689-P	CDS
Ca21chr1_C_albicans_SC5314	498204	499359	1156	306.33	3.19105	1.20501	1.19822	broadpeaksPE_peak_14	orf19.2925	gene
Ca21chr1_C_albicans_SC5314	515732	516161	430	372.98	7.41834	1.32801	4.9629	broadpeaksPE_peak_15	orf19.2930	gene
Ca21chr1_C_albicans_SC5314	518691	518976	286	307.17	3.22419	1.20628	1.22542	broadpeaksPE_peak_16	orf19.2933	gene
Ca21chr1_C_albicans_SC5314	521359	521709	351	376.08	3.69003	1.20405	1.60425	broadpeaksPE_peak_17	orf19.2935	gene
Ca21chr1_C_albicans_SC5314	522942	523184	243	333.92	6.44675	1.31247	4.09778	broadpeaksPE_peak_18	orf19.2936	gene
Ca21chr1_C_albicans_SC5314	550138	551269	1132	309.07	3.74833	1.21301	1.67546	broadpeaksPE_peak_19	orf19.2951	gene
Ca21chr1_C_albicans_SC5314	562370	562643	274	352.51	9.04549	1.38607	6.50383	broadpeaksPE_peak_20	orf19.2959	gene
Ca21chr1_C_albicans_SC5314	626058	626982	925	316.47	4.06417	1.23891	1.92437	broadpeaksPE_peak_21
Ca21chr1_C_albicans_SC5314	630344	631274	931	394.9	8.6297	1.34303	6.1246	broadpeaksPE_peak_22	orf19.2992	gene
Ca21chr1_C_albicans_SC5314	643426	643973	548	352.81	3.67043	1.20975	1.5882	broadpeaksPE_peak_23	orf19.3002	gene
Ca21chr1_C_albicans_SC5314	650608	651054	447	337.29	4.78158	1.25876	2.54429	broadpeaksPE_peak_24	orf19.3003.1	gene
Ca21chr1_C_albicans_SC5314	663998	664413	416	317.67	4.37666	1.24948	2.20516	broadpeaksPE_peak_25	orf19.3010.1	gene
Ca21chr1_C_albicans_SC5314	675173	675898	726	350.2	3.38582	1.19894	1.35555	broadpeaksPE_peak_26	orf19.3014	gene
Ca21chr1_C_albicans_SC5314	718858	719436	579	347.82	5.36584	1.26983	3.10467	broadpeaksPE_peak_27	tN(GUU)3-T-E1	exon
Ca21chr1_C_albicans_SC5314	766546	766786	241	330.64	4.21502	1.23919	2.05492	broadpeaksPE_peak_28	orf19.71-P	CDS
Ca21chr1_C_albicans_SC5314	851958	852241	284	308.15	3.33409	1.21103	1.31226	broadpeaksPE_peak_29	orf19.4481-P	CDS
Ca21chr1_C_albicans_SC5314	859788	860417	630	308.51	3.38643	1.21326	1.35365	broadpeaksPE_peak_30	orf19.1042	gene
Ca21chr1_C_albicans_SC5314	870849	871090	242	319.08	3.54769	1.21648	1.48728	broadpeaksPE_peak_31	orf19.1051	gene
Ca21chr1_C_albicans_SC5314	872045	872432	388	329.7	5.76573	1.29662	3.43558	broadpeaksPE_peak_32	orf19.1052	gene
Ca21chr1_C_albicans_SC5314	874427	874775	349	338.39	5.71439	1.29172	3.37724	broadpeaksPE_peak_33	orf19.1054	gene
Ca21chr1_C_albicans_SC5314	890436	890791	356	345.64	7.83479	1.35043	5.38932	broadpeaksPE_peak_34	orf19.1065	gene
Ca21chr1_C_albicans_SC5314	1161396	1161876	481	315.31	4.07166	1.24023	1.92367	broadpeaksPE_peak_35	orf19.412-P	CDS
Ca21chr1_C_albicans_SC5314	1163693	1164148	456	333.52	3.93712	1.22795	1.80916	broadpeaksPE_peak_36	orf19.411	gene
Ca21chr1_C_albicans_SC5314	1168037	1169021	985	469.53	3.39189	1.16977	1.3635	broadpeaksPE_peak_37	tN(GUU)2-T-E1	exon
Ca21chr1_C_albicans_SC5314	1177890	1178308	419	324.55	3.63043	1.21781	1.55823	broadpeaksPE_peak_38	orf19.2489	gene
Ca21chr1_C_albicans_SC5314	1195482	1196298	817	363.48	5.99124	1.28982	3.63492	broadpeaksPE_peak_39	orf19.2478.1	gene
Ca21chr1_C_albicans_SC5314	1375943	1376255	313	371.08	3.86711	1.21087	1.75787	broadpeaksPE_peak_40	orf19.6265.1-P	CDS
Ca21chr1_C_albicans_SC5314	1501862	1502459	598	308	2.99766	1.19519	1.05269	broadpeaksPE_peak_41	orf19.6200	gene
Ca21chr1_C_albicans_SC5314	1562748	1566244	3497	507.85	15.0637	1.4372	12.2402	broadpeaksPE_peak_42	CEN1	centromere
Ca21chr1_C_albicans_SC5314	1573830	1574069	240	338.43	5.97957	1.29995	3.62885	broadpeaksPE_peak_43
Ca21chr1_C_albicans_SC5314	1575304	1575808	505	329.54	4.5629	1.25388	2.34802	broadpeaksPE_peak_44
Ca21chr1_C_albicans_SC5314	1576902	1578961	2060	326.52	5.38708	1.28028	3.12639	broadpeaksPE_peak_45
Ca21chr1_C_albicans_SC5314	1606489	1606817	329	314.08	3.81741	1.22953	1.71524	broadpeaksPE_peak_46	orf19.4426-P	CDS
Ca21chr1_C_albicans_SC5314	1688413	1688753	341	4417.48	76.1351	1.3125	72.5924	broadpeaksPE_peak_47	MRS-1	repeat_region
Ca21chr1_C_albicans_SC5314	1690622	1691000	379	717.32	4.99097	1.17418	2.72834	broadpeaksPE_peak_48	MRS-1	repeat_region
Ca21chr1_C_albicans_SC5314	1694030	1694735	706	367.42	4.00273	1.21781	1.87143	broadpeaksPE_peak_49	MRS-1	repeat_region
Ca21chr1_C_albicans_SC5314	1708727	1709126	400	315.85	3.44266	1.21315	1.40155	broadpeaksPE_peak_50	orf19.5056	gene
Ca21chr1_C_albicans_SC5314	1712027	1712383	357	342.31	7.18497	1.33732	4.74607	broadpeaksPE_peak_51	orf19.5058	gene
Ca21chr1_C_albicans_SC5314	1720705	1721550	846	304.33	3.01215	1.19718	1.05932	broadpeaksPE_peak_52	orf19.5061	gene
Ca21chr1_C_albicans_SC5314	1832363	1833116	754	326.34	5.20587	1.27998	2.91487	broadpeaksPE_peak_53	orf19.5114-P	CDS
Ca21chr1_C_albicans_SC5314	2407069	2408320	1252	336.43	4.01496	1.22923	1.88065	broadpeaksPE_peak_54	orf19.2329.1	gene
Ca21chr1_C_albicans_SC5314	2410281	2410728	448	416.24	13.6787	1.43721	10.9698	broadpeaksPE_peak_55	tI(UAU)1-T-E2	exon
Ca21chr1_C_albicans_SC5314	2430197	2431019	823	326.6	4.48357	1.25076	2.29176	broadpeaksPE_peak_56	orf19.2312	gene
Ca21chr1_C_albicans_SC5314	2500048	2500320	273	330	3.06338	1.19101	1.10293	broadpeaksPE_peak_57	orf19.663-P	CDS
Ca21chr1_C_albicans_SC5314	2604028	2604493	466	309.48	3.29205	1.20858	1.27925	broadpeaksPE_peak_59	orf19.5278-P	CDS
Ca21chr1_C_albicans_SC5314	2713759	2714515	757	310.4	3.56382	1.22062	1.49663	broadpeaksPE_peak_60	orf19.5219	gene
Ca21chr1_C_albicans_SC5314	2730033	2730421	389	321.52	4.15986	1.24069	2.00479	broadpeaksPE_peak_61	orf19.3765	gene
Ca21chr1_C_albicans_SC5314	2742130	2742983	854	328.57	4.84307	1.26103	2.62647	broadpeaksPE_peak_62	orf19.3760-P	CDS
Ca21chr1_C_albicans_SC5314	2752607	2753293	687	315.9	3.38328	1.21066	1.35062	broadpeaksPE_peak_63	orf19.6362	gene
Ca21chr1_C_albicans_SC5314	3058493	3059798	1306	307.66	3.29746	1.20936	1.28391	broadpeaksPE_peak_64
Ca21chr1_C_albicans_SC5314	3061008	3061261	254	356.83	8.05462	1.35784	5.54629	broadpeaksPE_peak_65	tA(AGC)7-T	tRNA
Ca21chr1_C_albicans_SC5314	3120171	3120715	545	349.15	3.8459	1.21783	1.73719	broadpeaksPE_peak_66	orf19.7222-P	CDS
Ca21chr1_C_albicans_SC5314	3181343	3182074	732	463.97	3.17003	1.16264	1.18508	broadpeaksPE_peak_67	orf19.7271-P	CDS
Ca21chr1_C_albicans_SC5314	2587884	2588145	262	336	6.39838	1.32134	3.96576	NarrowpeaksPE_peak_30
Ca21chr1_C_albicans_SC5314	2588467	2589512	1046	391	8.97703	1.37165	6.38174	NarrowpeaksPE_peak_31
Ca21chr1_C_albicans_SC5314	41009	41660	652	305.57	3.81972	1.22144	1.68181	C_albicans_MACS2_PE_broad_peak_4
Ca21chr1_C_albicans_SC5314	225396	225661	266	294.58	3.82134	1.23908	1.6861	C_albicans_MACS2_PE_broad_peak_6
Ca21chr1_C_albicans_SC5314	298393	298636	244	297.98	5.00366	1.28545	2.71227	C_albicans_MACS2_PE_broad_peak_9
Ca21chr1_C_albicans_SC5314	541850	542655	806	294.25	4.15907	1.25406	1.96644	C_albicans_MACS2_PE_broad_peak_18
Ca21chr1_C_albicans_SC5314	632525	632891	367	298.15	3.7883	1.23565	1.66628	C_albicans_MACS2_PE_broad_peak_22
Ca21chr1_C_albicans_SC5314	723383	724032	650	312.8	3.10908	1.19885	1.12735	C_albicans_MACS2_PE_broad_peak_28
Ca21chr1_C_albicans_SC5314	733477	734108	632	285.86	3.54957	1.23036	1.46794	C_albicans_MACS2_PE_broad_peak_29
Ca21chr1_C_albicans_SC5314	1153425	1153970	546	278.78	3.16576	1.21485	1.16366	C_albicans_MACS2_PE_broad_peak_34
Ca21chr1_C_albicans_SC5314	1510589	1511533	945	287.38	3.5609	1.23027	1.47572	C_albicans_MACS2_PE_broad_peak_41
Ca21chr1_C_albicans_SC5314	2597814	2598867	1054	297.29	4.60996	1.27109	2.3562	C_albicans_MACS2_PE_broad_peak_55
Ca21chr1_C_albicans_SC5314	2601714	2602310	597	295.51	4.30343	1.2593	2.09073	C_albicans_MACS2_PE_broad_peak_56
Ca21chr2_C_albicans_SC5314	165820	166135	316	355.23	7.45014	1.33471	5.01626	broadpeaksPE_peak_68	orf19.2023-P	CDS
Ca21chr2_C_albicans_SC5314	175568	176088	521	349.98	5.85408	1.28561	3.55903	broadpeaksPE_peak_69	orf19.2017-T-E1	exon
Ca21chr2_C_albicans_SC5314	182251	182832	582	317.14	4.1594	1.2438	1.99263	broadpeaksPE_peak_70	orf19.2013-P	CDS
Ca21chr2_C_albicans_SC5314	494313	496215	1903	318.07	4.34435	1.24915	2.16746	broadpeaksPE_peak_71	orf19.1571-P	CDS
Ca21chr2_C_albicans_SC5314	507056	508114	1059	326.42	5.33723	1.28379	3.03926	broadpeaksPE_peak_72	orf19.1577	gene
Ca21chr2_C_albicans_SC5314	645905	646177	273	318.86	4.20467	1.24399	2.04146	broadpeaksPE_peak_73	orf19.5776	gene
Ca21chr2_C_albicans_SC5314	779335	780266	932	317.58	4.28609	1.24806	2.10664	broadpeaksPE_peak_74	orf19.851-P	CDS
Ca21chr2_C_albicans_SC5314	789773	790479	707	400.47	10.6852	1.40122	8.05311	broadpeaksPE_peak_75	orf19.848	gene
Ca21chr2_C_albicans_SC5314	800650	801432	783	326.34	3.51841	1.21243	1.46562	broadpeaksPE_peak_76	orf19.843	gene
Ca21chr2_C_albicans_SC5314	810255	811294	1040	419.99	10.2833	1.36481	7.70806	broadpeaksPE_peak_77	tR(UCU)3	gene
Ca21chr2_C_albicans_SC5314	829971	830226	256	313.86	3.90453	1.23413	1.7796	broadpeaksPE_peak_78
Ca21chr2_C_albicans_SC5314	859983	860231	249	317.3	4.19981	1.24427	2.03645	broadpeaksPE_peak_79	orf19.813-P	CDS
Ca21chr2_C_albicans_SC5314	953920	954725	806	311.22	3.59508	1.22147	1.52571	broadpeaksPE_peak_80	orf19.4495	gene
Ca21chr2_C_albicans_SC5314	961430	961685	256	334	6.08071	1.30474	3.72896	broadpeaksPE_peak_81	orf19.4490	gene
Ca21chr2_C_albicans_SC5314	1019955	1020719	765	313.05	3.53661	1.21795	1.48283	broadpeaksPE_peak_82	orf19.4123-P	CDS
Ca21chr2_C_albicans_SC5314	1030893	1031446	554	330.89	3.47742	1.20909	1.43136	broadpeaksPE_peak_83	orf19.3526-P	CDS
Ca21chr2_C_albicans_SC5314	1039114	1039679	566	308.77	3.4175	1.21456	1.37863	broadpeaksPE_peak_84	orf19.3530	gene
Ca21chr2_C_albicans_SC5314	1040951	1041818	868	322.6	3.68077	1.221	1.59498	broadpeaksPE_peak_85	orf19.3531	gene
Ca21chr2_C_albicans_SC5314	1047956	1048272	317	351.67	3.32026	1.19559	1.30358	broadpeaksPE_peak_86	orf19.3537-P	CDS
Ca21chr2_C_albicans_SC5314	1073316	1073750	435	306.49	3.20596	1.20562	1.21023	broadpeaksPE_peak_87	orf19.3552	gene
Ca21chr2_C_albicans_SC5314	1077456	1078090	635	344.07	4.21192	1.23451	2.04215	broadpeaksPE_peak_88	tQ(UUG)3-T-E2	exon
Ca21chr2_C_albicans_SC5314	1083763	1084710	948	318.46	4.18361	1.2432	2.02293	broadpeaksPE_peak_89	orf19.3555	gene
Ca21chr2_C_albicans_SC5314	1107344	1107787	444	304.67	3.04128	1.19847	1.08203	broadpeaksPE_peak_90	orf19.3569-P	CDS
Ca21chr2_C_albicans_SC5314	1112247	1112995	749	336.71	5.07555	1.2671	2.82656	broadpeaksPE_peak_91	tI(AAU)3-T-E2	exon
Ca21chr2_C_albicans_SC5314	1143649	1144544	896	366.25	9.21209	1.36551	6.72135	broadpeaksPE_peak_92	tS(AGA)4-T	tRNA
Ca21chr2_C_albicans_SC5314	1167307	1167574	268	346.61	6.96638	1.32857	4.54352	broadpeaksPE_peak_93	orf19.6882.1-P	CDS
Ca21chr2_C_albicans_SC5314	1341847	1342647	801	306.63	3.21537	1.20619	1.2156	broadpeaksPE_peak_94	orf19.35-P	CDS
Ca21chr2_C_albicans_SC5314	1395715	1396026	312	312.45	3.49386	1.21652	1.44321	broadpeaksPE_peak_95	orf19.2232-P	CDS
Ca21chr2_C_albicans_SC5314	1592707	1592960	254	312.92	3.81796	1.23041	1.71064	broadpeaksPE_peak_96	orf19.2200-P	CDS
Ca21chr2_C_albicans_SC5314	1618893	1620493	1601	368.31	4.11258	1.21974	1.96013	broadpeaksPE_peak_97	orf19.2185-P	CDS
Ca21chr2_C_albicans_SC5314	1665729	1666047	319	420.11	6.76629	1.29102	4.35419	broadpeaksPE_peak_98	Tca3-2	retrotransposon
Ca21chr2_C_albicans_SC5314	1769087	1769964	878	314.02	3.82653	1.23069	1.71423	broadpeaksPE_peak_99	orf19.3606	gene
Ca21chr2_C_albicans_SC5314	1901525	1902121	597	350.29	3.06054	1.18482	1.09949	broadpeaksPE_peak_100	orf19.4093	gene
Ca21chr2_C_albicans_SC5314	1910738	1912473	1736	341.04	3.33934	1.19979	1.31887	broadpeaksPE_peak_101	orf19.564	gene
Ca21chr2_C_albicans_SC5314	1917219	1917745	527	330.32	4.18985	1.23875	2.02753	broadpeaksPE_peak_102
Ca21chr2_C_albicans_SC5314	1926183	1929443	3261	507.8	12.8582	1.38849	10.1391	broadpeaksPE_peak_103	CEN2	centromere
Ca21chr2_C_albicans_SC5314	1958102	1958696	595	316.23	3.59196	1.21979	1.52076	broadpeaksPE_peak_104	orf19.1397-P	CDS
Ca21chr2_C_albicans_SC5314	2098161	2099966	1806	313.96	3.44692	1.20896	1.40518	broadpeaksPE_peak_105	orf19.1759	gene
Ca21chr2_C_albicans_SC5314	2137806	2138118	313	313.26	3.84884	1.232	1.73169	broadpeaksPE_peak_106	orf19.1742	gene
Ca21chr2_C_albicans_SC5314	2140565	2142245	1681	371.46	5.36727	1.26585	3.05617	broadpeaksPE_peak_107	HOK-2	repeat_region
Ca21chr2_C_albicans_SC5314	2148961	2149406	446	7272.39	12.8446	1.08834	10.1183	broadpeaksPE_peak_108	MRS-2	repeat_region
Ca21chr2_C_albicans_SC5314	2167772	2169187	1416	386.7	4.40897	1.22647	2.21916	broadpeaksPE_peak_109	tV(UAC)1-T-E2	exon
Ca21chr2_C_albicans_SC5314	2229961	2230892	932	809.28	16.567	1.34488	13.6997	broadpeaksPE_peak_110
Ca21chr2_C_albicans_SC5314	1752	2431	680	287.57	3.43419	1.22435	1.37411	C_albicans_MACS2_PE_broad_peak_64
Ca21chr2_C_albicans_SC5314	54644	55142	499	280.03	3.20075	1.21605	1.19223	C_albicans_MACS2_PE_broad_peak_65
Ca21chr2_C_albicans_SC5314	805861	806642	782	319.06	4.26064	1.24626	2.05741	C_albicans_MACS2_PE_broad_peak_74
Ca21chr2_C_albicans_SC5314	1292168	1292422	255	278.48	3.13787	1.21354	1.14266	C_albicans_MACS2_PE_broad_peak_89
Ca21chr2_C_albicans_SC5314	1621657	1622041	385	325.18	3.12979	1.19562	1.142	C_albicans_MACS2_PE_broad_peak_93
Ca21chr2_C_albicans_SC5314	1876506	1877165	660	277.56	3.05146	1.20952	1.0774	C_albicans_MACS2_PE_broad_peak_96
Ca21chr2_C_albicans_SC5314	1934854	1935586	733	279.35	3.0362	1.20797	1.06834	C_albicans_MACS2_PE_broad_peak_100
Ca21chr2_C_albicans_SC5314	2125693	2126307	615	281.63	3.44468	1.2272	1.3809	C_albicans_MACS2_PE_broad_peak_102
Ca21chr3_C_albicans_SC5314	1874	2499	626	2405.52	13.1276	1.15327	10.4634	broadpeaksPE_peak_111
Ca21chr3_C_albicans_SC5314	8319	8959	641	1521.3	7.30812	1.14637	4.85829	broadpeaksPE_peak_112
Ca21chr3_C_albicans_SC5314	93668	94114	447	308.47	3.38815	1.21339	1.35436	broadpeaksPE_peak_113
Ca21chr3_C_albicans_SC5314	133132	133428	297	361.35	4.88437	1.25222	2.66166	broadpeaksPE_peak_114	orf19.5383-T	mRNA
Ca21chr3_C_albicans_SC5314	187462	188141	680	314.5	2.98528	1.19243	1.03914	broadpeaksPE_peak_115	orf19.6169-T-E1	exon
Ca21chr3_C_albicans_SC5314	272865	273118	254	314.54	3.99486	1.2372	1.85905	broadpeaksPE_peak_116
Ca21chr3_C_albicans_SC5314	379071	380158	1088	337.37	5.22225	1.2743	2.94217	broadpeaksPE_peak_117	orf19.1671.1-P	CDS
Ca21chr3_C_albicans_SC5314	397664	400372	2709	311.67	3.65062	1.22361	1.57174	broadpeaksPE_peak_118	orf19.1665	gene
Ca21chr3_C_albicans_SC5314	407836	408284	449	325.37	4.22378	1.24169	2.06354	broadpeaksPE_peak_119	tV(AAC)2	gene
Ca21chr3_C_albicans_SC5314	411829	412329	501	382.21	6.90701	1.30227	4.51871	broadpeaksPE_peak_120	orf19.1661	gene
Ca21chr3_C_albicans_SC5314	415683	416670	988	337.53	3.78571	1.21998	1.69204	broadpeaksPE_peak_121	orf19.1658-P	CDS
Ca21chr3_C_albicans_SC5314	423279	423849	571	357.54	3.6213	1.20628	1.5478	broadpeaksPE_peak_122	tY(GUA)2-T-E2	exon
Ca21chr3_C_albicans_SC5314	447565	447875	311	401.62	11.8585	1.42823	9.17031	broadpeaksPE_peak_123	tE(UUC)2-T-E2	exon
Ca21chr3_C_albicans_SC5314	458108	458750	643	323.82	3.40405	1.20894	1.36958	broadpeaksPE_peak_124	orf19.1635	gene
Ca21chr3_C_albicans_SC5314	538927	539403	477	367.06	5.64791	1.27576	3.33362	broadpeaksPE_peak_125	orf19.236-P	CDS
Ca21chr3_C_albicans_SC5314	588833	589249	417	314.21	3.16347	1.20112	1.17753	broadpeaksPE_peak_126	orf19.263.1-T	mRNA
Ca21chr3_C_albicans_SC5314	591972	592345	374	438.31	20.3985	1.5611	17.4478	broadpeaksPE_peak_127	tF(GAA)1-T-E2	exon
Ca21chr3_C_albicans_SC5314	703236	705779	2544	311.24	3.2675	1.20683	1.26074	broadpeaksPE_peak_128	tE(UUC)1-T	tRNA
Ca21chr3_C_albicans_SC5314	712556	713173	618	318.56	3.5691	1.21747	1.50628	broadpeaksPE_peak_129
Ca21chr3_C_albicans_SC5314	782724	783638	915	347.16	4.60593	1.24611	2.40733	broadpeaksPE_peak_130	orf19.6948	gene
Ca21chr3_C_albicans_SC5314	835740	836271	532	364.12	11.2445	1.41543	8.67227	broadpeaksPE_peak_132	tE(UUC)6-T-E2	exon
Ca21chr3_C_albicans_SC5314	845249	845820	572	342.2	4.22993	1.23466	2.06753	broadpeaksPE_peak_133	orf19.2804	gene
Ca21chr3_C_albicans_SC5314	857090	857767	678	344.28	3.63361	1.21105	1.55901	broadpeaksPE_peak_134	orf19.5854	gene
Ca21chr3_C_albicans_SC5314	880963	881569	607	314.41	3.3388	1.209	1.31841	broadpeaksPE_peak_135	orf19.5866-P	CDS
Ca21chr3_C_albicans_SC5314	925782	926487	706	312.8	3.4284	1.21374	1.38944	broadpeaksPE_peak_136	orf19.5896-P	CDS
Ca21chr3_C_albicans_SC5314	974074	975432	1359	336.28	6.0959	1.30209	3.75195	broadpeaksPE_peak_137	orf19.5917.3-P	CDS
Ca21chr3_C_albicans_SC5314	980706	981280	575	324.53	4.76475	1.26291	2.53511	broadpeaksPE_peak_138	orf19.5921	gene
Ca21chr3_C_albicans_SC5314	1003517	1004569	1053	310.55	3.58518	1.22137	1.51569	broadpeaksPE_peak_139	orf19.5934	gene
Ca21chr3_C_albicans_SC5314	1034902	1035988	1087	379.47	4.39405	1.22788	2.20723	broadpeaksPE_peak_140	orf19.5949	gene
Ca21chr3_C_albicans_SC5314	1075224	1075588	365	305.63	3.1253	1.20224	1.14572	broadpeaksPE_peak_141	orf19.5968	gene
Ca21chr3_C_albicans_SC5314	1153251	1153487	237	325.07	4.63057	1.25854	2.40824	broadpeaksPE_peak_142	orf19.6002	gene
Ca21chr3_C_albicans_SC5314	1212464	1213022	559	314.56	3.99571	1.23727	1.85955	broadpeaksPE_peak_143
Ca21chr3_C_albicans_SC5314	1215685	1216330	646	312.87	3.83874	1.23066	1.73377	broadpeaksPE_peak_144	orf19.6983-P	CDS
Ca21chr3_C_albicans_SC5314	1224979	1225844	866	329.02	5.74787	1.29382	3.43848	broadpeaksPE_peak_145
Ca21chr3_C_albicans_SC5314	1233064	1233405	342	338.46	4.94625	1.26512	2.68022	broadpeaksPE_peak_146
Ca21chr3_C_albicans_SC5314	1237307	1237589	283	337.1	3.62196	1.21277	1.55139	broadpeaksPE_peak_147	orf19.6987-P	CDS
Ca21chr3_C_albicans_SC5314	1469585	1471178	1594	339.85	6.3475	1.30104	4.04195	broadpeaksPE_peak_148	tH(GUG)3-T-E2	exon
Ca21chr3_C_albicans_SC5314	1472797	1473677	881	313.63	3.61643	1.22157	1.54295	broadpeaksPE_peak_149
Ca21chr3_C_albicans_SC5314	1547394	1547673	280	306.13	3.16858	1.20407	1.18018	broadpeaksPE_peak_150
Ca21chr3_C_albicans_SC5314	1563796	1565407	1612	317.55	4.30484	1.24751	2.13529	broadpeaksPE_peak_152
Ca21chr3_C_albicans_SC5314	1618286	1618691	406	333.65	6.20264	1.30989	3.83068	broadpeaksPE_peak_153	orf19.6793-P	CDS
Ca21chr3_C_albicans_SC5314	1678820	1679201	382	335.64	4.36028	1.24358	2.1754	broadpeaksPE_peak_154	orf19.6763-P	CDS
Ca21chr3_C_albicans_SC5314	1715544	1715969	426	428.3	8.52181	1.32328	6.03418	broadpeaksPE_peak_155	tR(UCU)5-T	tRNA
Ca21chr3_C_albicans_SC5314	1726381	1727617	1237	309.67	3.0859	1.19899	1.11661	broadpeaksPE_peak_156
Ca21chr3_C_albicans_SC5314	1786794	1787627	834	363.34	4.34486	1.23183	2.17125	broadpeaksPE_peak_157	rho-3b	long_terminal_repeat
Ca21chr3_C_albicans_SC5314	1792981	1793308	328	564.21	11.2737	1.33956	8.60253	broadpeaksPE_peak_158
Ca21chr3_C_albicans_SC5314	1798397	1799018	622	373.42	4.98637	1.24955	2.73381	broadpeaksPE_peak_159
Ca21chr3_C_albicans_SC5314	823057	826863	3807	526	30.4671	1.72797	26.9166	C_albicans_MACS2_PE_peak_54	CEN3	centromere
Ca21chr3_C_albicans_SC5314	1560929	1561503	575	430	7.922	1.32209	5.38572	NarrowpeaksPE_peak_68
Ca21chr3_C_albicans_SC5314	1562229	1562507	279	338	6.52121	1.32452	4.08137	NarrowpeaksPE_peak_69
Ca21chr3_C_albicans_SC5314	561943	562400	458	296.89	4.80571	1.27946	2.52022	C_albicans_MACS2_PE_broad_peak_118
Ca21chr3_C_albicans_SC5314	593479	594170	692	282.18	3.28531	1.21932	1.25759	C_albicans_MACS2_PE_broad_peak_121
Ca21chr3_C_albicans_SC5314	601787	602227	441	281.73	3.38959	1.22475	1.33657	C_albicans_MACS2_PE_broad_peak_122
Ca21chr3_C_albicans_SC5314	778997	780418	1422	292.15	3.57657	1.22866	1.49118	C_albicans_MACS2_PE_broad_peak_124
Ca21chr3_C_albicans_SC5314	828015	828485	471	324.47	3.03999	1.19166	1.07098	C_albicans_MACS2_PE_broad_peak_126
Ca21chr3_C_albicans_SC5314	941388	941932	545	302.13	3.23957	1.20905	1.22538	C_albicans_MACS2_PE_broad_peak_130
Ca21chr3_C_albicans_SC5314	1120107	1120406	300	296.53	5.16383	1.29192	2.85925	C_albicans_MACS2_PE_broad_peak_135
Ca21chr3_C_albicans_SC5314	1227004	1227707	704	281	3.25006	1.21805	1.23176	C_albicans_MACS2_PE_broad_peak_137
Ca21chr3_C_albicans_SC5314	1248408	1248676	269	303.57	4.07508	1.24582	1.89922	C_albicans_MACS2_PE_broad_peak_140
Ca21chr3_C_albicans_SC5314	1579155	1579603	449	279.77	3.14739	1.21343	1.15162	C_albicans_MACS2_PE_broad_peak_145
Ca21chr3_C_albicans_SC5315	1594438	1595348	911	307.79	6.69847	1.34078	4.25514	C_albicans_MACS2_PE_broad_peak_146
Ca21chr3_C_albicans_SC5314	1602370	1602634	265	301.43	3.55443	1.22361	1.47655	C_albicans_MACS2_PE_broad_peak_147
Ca21chr3_C_albicans_SC5314	1724069	1724693	625	279.49	3.23003	1.21771	1.21341	C_albicans_MACS2_PE_broad_peak_151
Ca21chr4_C_albicans_SC5314	216805	217393	589	327.44	5.67335	1.28776	3.39779	broadpeaksPE_peak_160	orf19.4682-T	mRNA
Ca21chr4_C_albicans_SC5314	226765	228931	2167	337.02	5.34903	1.26747	3.12655	broadpeaksPE_peak_161	tD(GUC)6	gene
Ca21chr4_C_albicans_SC5314	233663	233900	238	335.88	5.96782	1.30272	3.60089	broadpeaksPE_peak_162	orf19.4674.1	gene
Ca21chr4_C_albicans_SC5314	238223	239033	811	331.59	3.62786	1.21519	1.55385	broadpeaksPE_peak_163
Ca21chr4_C_albicans_SC5314	245632	246384	753	384.54	6.70365	1.29386	4.33248	broadpeaksPE_peak_164	tS(UGA)3	gene
Ca21chr4_C_albicans_SC5314	256115	256818	704	372.39	7.90443	1.33439	5.4841	broadpeaksPE_peak_165	orf19.4660	gene
Ca21chr4_C_albicans_SC5314	263918	264605	688	323.75	4.91001	1.26819	2.6676	broadpeaksPE_peak_166	orf19.4657	gene
Ca21chr4_C_albicans_SC5314	272286	272649	364	308.63	3.40229	1.21403	1.36505	broadpeaksPE_peak_167	orf19.4654	gene
Ca21chr4_C_albicans_SC5314	315734	316221	488	324.14	5.02022	1.27435	2.74449	broadpeaksPE_peak_168	orf19.4632	gene
Ca21chr4_C_albicans_SC5314	317326	317633	308	332.24	3.2709	1.19992	1.26343	broadpeaksPE_peak_169	orf19.4631-T	mRNA
Ca21chr4_C_albicans_SC5314	321169	321513	345	324.76	4.65361	1.25663	2.45487	broadpeaksPE_peak_170	orf19.4630-P	CDS
Ca21chr4_C_albicans_SC5314	326762	327130	369	323.66	5.00032	1.27296	2.73449	broadpeaksPE_peak_171	snR76	gene
Ca21chr4_C_albicans_SC5314	441226	442994	1769	305.18	3.08692	1.2005	1.11666	broadpeaksPE_peak_172	orf19.4568	gene
Ca21chr4_C_albicans_SC5314	463187	464042	856	323.06	3.94804	1.23106	1.83102	broadpeaksPE_peak_173	orf19.2769	gene
Ca21chr4_C_albicans_SC5314	538272	538573	302	314.99	4.06196	1.23897	1.92463	broadpeaksPE_peak_174	orf19.2739-P	CDS
Ca21chr4_C_albicans_SC5314	605617	605882	266	311.44	3.63738	1.22315	1.56171	broadpeaksPE_peak_175	orf19.2701	gene
Ca21chr4_C_albicans_SC5314	627106	627561	456	335.28	4.53368	1.25105	2.31953	broadpeaksPE_peak_176	tT(UGU)1	gene
Ca21chr4_C_albicans_SC5314	637238	637520	283	529.03	12.3727	1.36356	9.68396	broadpeaksPE_peak_177	zeta-4a	long_terminal_repeat
Ca21chr4_C_albicans_SC5314	726736	727337	602	313.56	3.8972	1.23334	1.77866	broadpeaksPE_peak_178	orf19.3374	gene
Ca21chr4_C_albicans_SC5314	736715	736967	253	326.94	5.37306	1.28583	3.0632	broadpeaksPE_peak_179
Ca21chr4_C_albicans_SC5314	759949	760753	805	377.72	4.74366	1.24045	2.51356	broadpeaksPE_peak_180	orf19.1323	gene
Ca21chr4_C_albicans_SC5314	765184	765964	781	314.97	3.98714	1.23704	1.85175	broadpeaksPE_peak_181	orf19.1318	gene
Ca21chr4_C_albicans_SC5314	772536	773121	586	310.37	3.38145	1.21241	1.35042	broadpeaksPE_peak_182	tQ(UUG)1-T	tRNA
Ca21chr4_C_albicans_SC5314	778748	779061	314	335.49	4.55652	1.25083	2.34487	broadpeaksPE_peak_183
Ca21chr4_C_albicans_SC5314	780969	781224	256	408.48	10.3181	1.37908	7.73625	broadpeaksPE_peak_184	tD(GUC)4-T	tRNA
Ca21chr4_C_albicans_SC5314	782281	783693	1413	409.76	7.86234	1.31445	5.41625	broadpeaksPE_peak_185	tD(GUC)3	gene
Ca21chr4_C_albicans_SC5314	787619	789222	1604	329.56	3.66182	1.21725	1.58565	broadpeaksPE_peak_186	orf19.1309	gene
Ca21chr4_C_albicans_SC5314	791498	792786	1289	311.79	3.70209	1.22622	1.60964	broadpeaksPE_peak_187	orf19.1307	gene
Ca21chr4_C_albicans_SC5314	804835	805633	799	307.92	3.33628	1.21123	1.31263	broadpeaksPE_peak_188	orf19.1298	gene
Ca21chr4_C_albicans_SC5314	807484	808238	755	333.64	5.35894	1.2812	3.06088	broadpeaksPE_peak_189	orf19.1297	gene
Ca21chr4_C_albicans_SC5314	840954	841351	398	317.76	4.33994	1.2498	2.15601	broadpeaksPE_peak_190	orf19.789	gene
Ca21chr4_C_albicans_SC5314	844471	844859	389	329.94	4.54657	1.25135	2.34723	broadpeaksPE_peak_191	orf19.787	gene
Ca21chr4_C_albicans_SC5314	848558	849473	916	331.53	6.05245	1.30379	3.70759	broadpeaksPE_peak_192	RB2-4a	repeat_region
Ca21chr4_C_albicans_SC5314	852013	852508	496	330.42	5.80835	1.29336	3.50442	broadpeaksPE_peak_193
Ca21chr4_C_albicans_SC5314	873381	874225	845	319.75	4.19961	1.24277	2.04177	broadpeaksPE_peak_194	orf19.5302	gene
Ca21chr4_C_albicans_SC5314	886168	886470	303	314.69	3.12294	1.19886	1.14841	broadpeaksPE_peak_195	orf19.5294	gene
Ca21chr4_C_albicans_SC5314	894414	894978	565	306.28	3.18359	1.2048	1.19087	broadpeaksPE_peak_196
Ca21chr4_C_albicans_SC5314	937283	937867	585	314.99	3.82867	1.22983	1.72336	broadpeaksPE_peak_197	orf19.1409.1	gene
Ca21chr4_C_albicans_SC5314	992010	995522	3513	496.74	12.5563	1.38682	9.84698	broadpeaksPE_peak_198	CEN4	centromere
Ca21chr4_C_albicans_SC5314	997052	997493	442	357.7	3.06556	1.15053	1.10527	broadpeaksPE_peak_199	orf19.3820	gene
Ca21chr4_C_albicans_SC5314	1006738	1007341	604	397.44	7.12454	1.30174	4.72543	broadpeaksPE_peak_200	tQ(UUG)5-T-E2	exon
Ca21chr4_C_albicans_SC5314	1036337	1036661	325	320.88	4.26411	1.24595	2.08786	broadpeaksPE_peak_201	orf19.3797	gene
Ca21chr4_C_albicans_SC5314	1038978	1039272	295	316.6	3.68245	1.22347	1.59702	broadpeaksPE_peak_202	orf19.3796	gene
Ca21chr4_C_albicans_SC5314	1041910	1042546	637	314.92	3.45997	1.21395	1.41806	broadpeaksPE_peak_203	orf19.3794	gene
Ca21chr4_C_albicans_SC5314	1054123	1054499	377	379.77	6.68578	1.30427	4.26115	broadpeaksPE_peak_204	orf19.3789	gene
Ca21chr4_C_albicans_SC5314	1139233	1139654	422	306.16	3.17504	1.20434	1.18541	broadpeaksPE_peak_205	orf19.6864-P	CDS
Ca21chr4_C_albicans_SC5314	1195372	1195818	447	454.26	8.81373	1.32317	6.33695	broadpeaksPE_peak_206	HOK-4	repeat_region
Ca21chr4_C_albicans_SC5314	1218106	1219067	962	330.45	5.4615	1.28495	3.16428	broadpeaksPE_peak_208	orf19.1239	gene
Ca21chr4_C_albicans_SC5314	1318988	1320774	1787	308.36	3.30083	1.20945	1.28504	broadpeaksPE_peak_209
Ca21chr4_C_albicans_SC5314	1325049	1325301	253	345.11	7.47072	1.34139	5.03129	broadpeaksPE_peak_210	tT(UGU)2	gene
Ca21chr4_C_albicans_SC5314	1331530	1331973	444	351.8	8.21354	1.3591	5.72927	broadpeaksPE_peak_211	tS(UGA)2	gene
Ca21chr4_C_albicans_SC5314	1200955	1201235	281	6916	71.9118	1.25135	68.1932	NarrowpeaksPE_peak_98	MRS-4	repeat_region
Ca21chr4_C_albicans_SC5314	1201959	1202275	317	1368	8.37554	1.17258	5.81425	NarrowpeaksPE_peak_99	MRS-4	repeat_region
Ca21chr4_C_albicans_SC5314	181174	181798	625	282.2	3.49744	1.22968	1.42048	C_albicans_MACS2_PE_broad_peak_156
Ca21chr4_C_albicans_SC5314	280782	281405	624	281.63	3.44413	1.22716	1.3808	C_albicans_MACS2_PE_broad_peak_165
Ca21chr4_C_albicans_SC5314	485440	486651	1212	297.93	3.37601	1.21691	1.33231	C_albicans_MACS2_PE_broad_peak_170
Ca21chr4_C_albicans_SC5314	622475	622729	255	289.15	3.76994	1.23917	1.64378	C_albicans_MACS2_PE_broad_peak_173
Ca21chr4_C_albicans_SC5314	657028	657260	233	281.02	3.38206	1.22457	1.33059	C_albicans_MACS2_PE_broad_peak_175
Ca21chr4_C_albicans_SC5314	1028176	1028575	400	301.15	5.09335	1.28747	2.78744	C_albicans_MACS2_PE_broad_peak_193
Ca21chr4_C_albicans_SC5314	1487076	1488042	967	288.03	3.48077	1.22635	1.41287	C_albicans_MACS2_PE_broad_peak_202	orf19.2866-P	CDS
Ca21chr5_C_albicans_SC5314	25947	26577	631	353.27	3.27981	1.19337	1.27032	broadpeaksPE_peak_212	orf19.979	gene
Ca21chr5_C_albicans_SC5314	66356	67134	779	381.84	4.80642	1.24248	2.56309	broadpeaksPE_peak_213	tS(CAG)1	gene
Ca21chr5_C_albicans_SC5314	108358	110402	2045	319.18	4.43421	1.25336	2.23481	broadpeaksPE_peak_214	orf19.935	gene
Ca21chr5_C_albicans_SC5314	112307	112929	623	309.5	3.48529	1.21745	1.43227	broadpeaksPE_peak_215
Ca21chr5_C_albicans_SC5314	217481	218241	761	418.67	5.44038	1.24977	3.12617	broadpeaksPE_peak_216	tE(UUC)4-T-E1	exon
Ca21chr5_C_albicans_SC5314	220071	220367	297	455.07	11.8549	1.38859	9.2031	broadpeaksPE_peak_217	tQ(CUG)1-T-E1	exon
Ca21chr5_C_albicans_SC5314	241377	241735	359	312.8	3.8278	1.23039	1.72321	broadpeaksPE_peak_218
Ca21chr5_C_albicans_SC5314	243038	243350	313	309	3.40668	1.21424	1.36777	broadpeaksPE_peak_219
Ca21chr5_C_albicans_SC5314	348016	348975	960	336.52	3.57927	1.21144	1.51561	broadpeaksPE_peak_220	orf19.4152	gene
Ca21chr5_C_albicans_SC5314	371926	372803	878	326.61	5.39501	1.2845	3.10196	broadpeaksPE_peak_221	RB2-5a	repeat_region
Ca21chr5_C_albicans_SC5314	406993	407234	242	317.16	4.00618	1.23711	1.86572	broadpeaksPE_peak_222
Ca21chr5_C_albicans_SC5314	408359	408676	318	310.05	3.54056	1.21958	1.4788	broadpeaksPE_peak_223	orf19.3193	gene
Ca21chr5_C_albicans_SC5314	411193	411650	458	317	4.12011	1.24001	1.98009	broadpeaksPE_peak_224	orf19.3192	gene
Ca21chr5_C_albicans_SC5314	421221	421620	400	321.93	3.78272	1.22542	1.684	broadpeaksPE_peak_225	orf19.3187	gene
Ca21chr5_C_albicans_SC5314	468552	471618	3067	496.95	17.919	1.4932	14.9932	broadpeaksPE_peak_226	CEN5	centromere
Ca21chr5_C_albicans_SC5314	507364	507716	353	319.22	4.05953	1.23787	1.91782	broadpeaksPE_peak_227
Ca21chr5_C_albicans_SC5314	639937	640919	983	335.41	5.09661	1.2714	2.81705	broadpeaksPE_peak_228	orf19.4309-P	CDS
Ca21chr5_C_albicans_SC5314	722726	723354	629	386.24	6.03375	1.279	3.71662	broadpeaksPE_peak_229	HOK-5	repeat_region
Ca21chr5_C_albicans_SC5314	725285	725631	347	674.82	9.23673	1.26582	6.70757	broadpeaksPE_peak_230	HOK-5	repeat_region
Ca21chr5_C_albicans_SC5314	815013	815927	915	311.92	3.71627	1.22694	1.61967	broadpeaksPE_peak_231
Ca21chr5_C_albicans_SC5314	856695	856957	263	432.6	9.51124	1.35682	6.94378	broadpeaksPE_peak_232	orf19.1105.2	gene
Ca21chr5_C_albicans_SC5314	891681	892398	718	310.05	3.53514	1.21958	1.47166	broadpeaksPE_peak_233	orf19.1287	gene
Ca21chr5_C_albicans_SC5314	1184079	1185200	1122	419.76	4.52092	1.21972	2.31597	broadpeaksPE_peak_234
Ca21chr5_C_albicans_SC5314	1186684	1187132	449	1107.1	53.0294	1.60094	49.6046	broadpeaksPE_peak_235
Ca21chr5_C_albicans_SC5314	491609	492545	937	299.34	4.87515	1.28128	2.58315	C_albicans_MACS2_PE_broad_peak_215
Ca21chr5_C_albicans_SC5314	503790	504798	1009	314.08	6.58736	1.33263	4.16919	C_albicans_MACS2_PE_broad_peak_216
Ca21chr5_C_albicans_SC5314	613776	614584	809	281.78	3.18309	1.2144	1.18143	C_albicans_MACS2_PE_broad_peak_218
Ca21chr5_C_albicans_SC5314	763040	763932	893	317.67	4.76002	1.2662	2.49489	C_albicans_MACS2_PE_broad_peak_222
Ca21chr5_C_albicans_SC5314	793084	793724	641	272.5	13.9251	1.07382	11.2723	C_albicans_MACS2_PE_broad_peak_223
Ca21chr5_C_albicans_SC5314	1033788	1035814	2027	287.01	3.1417	1.21019	1.15261	C_albicans_MACS2_PE_broad_peak_227
Ca21chr6_C_albicans_SC5314	88	2416	2329	745.38	23.8851	1.41695	20.9734	broadpeaksPE_peak_236	orf19.6339	gene
Ca21chr6_C_albicans_SC5314	5783	6928	1146	388.36	3.22408	1.1814	1.22704	broadpeaksPE_peak_237	orf19.6337-T-E1	exon
Ca21chr6_C_albicans_SC5314	30646	31156	511	315.13	3.99234	1.23717	1.85455	broadpeaksPE_peak_238	orf19.1186-P	CDS
Ca21chr6_C_albicans_SC5314	64608	64961	354	337.71	6.20395	1.30349	3.86582	broadpeaksPE_peak_239	orf19.1199	gene
Ca21chr6_C_albicans_SC5314	114816	115129	314	349.85	4.12472	1.22889	1.97911	broadpeaksPE_peak_240	orf19.4193.1-P	CDS
Ca21chr6_C_albicans_SC5314	328569	329005	437	328.46	5.31987	1.28326	3.01589	broadpeaksPE_peak_241	orf19.3428-P	CDS
Ca21chr6_C_albicans_SC5314	331975	332379	405	329.22	4.35012	1.24596	2.16334	broadpeaksPE_peak_242	orf19.3426	gene
Ca21chr6_C_albicans_SC5314	364337	364992	656	322.11	4.18381	1.24184	2.0239	broadpeaksPE_peak_243	orf19.3414	gene
Ca21chr6_C_albicans_SC5314	378649	379352	704	373.01	7.04791	1.30969	4.66574	broadpeaksPE_peak_244	tA(UGC)1	gene
Ca21chr6_C_albicans_SC5314	495630	497402	1773	322.21	4.36104	1.2484	2.18178	broadpeaksPE_peak_245	orf19.3480	gene
Ca21chr6_C_albicans_SC5314	562522	562871	350	320.09	3.76742	1.22541	1.67193	broadpeaksPE_peak_246	orf19.5543-P	CDS
Ca21chr6_C_albicans_SC5314	630650	631409	760	324.85	4.03038	1.23436	1.89215	broadpeaksPE_peak_247	orf19.5584	gene
Ca21chr6_C_albicans_SC5314	688746	689590	845	315.15	3.59604	1.22017	1.52639	broadpeaksPE_peak_248	orf19.5616	gene
Ca21chr6_C_albicans_SC5314	712549	714205	1657	324.33	4.71391	1.26235	2.47778	broadpeaksPE_peak_249	orf19.5627	gene
Ca21chr6_C_albicans_SC5314	773460	773704	245	312.12	3.08056	1.19784	1.11333	broadpeaksPE_peak_250	orf19.5732-P	CDS
Ca21chr6_C_albicans_SC5314	774708	774947	240	311.26	3.65117	1.22313	1.57922	broadpeaksPE_peak_251	orf19.5732	gene
Ca21chr6_C_albicans_SC5314	811047	811856	810	305.11	3.08074	1.2002	1.11227	broadpeaksPE_peak_252	orf19.5750-P	CDS
Ca21chr6_C_albicans_SC5314	862431	863532	1102	484.85	7.9772	1.28921	5.5103	broadpeaksPE_peak_253	RB2-6	repeat_region
Ca21chr6_C_albicans_SC5314	867260	867622	363	1560.09	26.6179	1.32007	23.4233	broadpeaksPE_peak_254	MRS-6	repeat_region
Ca21chr6_C_albicans_SC5314	872575	873890	1316	434.43	4.82423	1.22749	2.57991	broadpeaksPE_peak_255	MRS-6	repeat_region
Ca21chr6_C_albicans_SC5314	874905	875428	524	373.66	5.65417	1.27378	3.32518	broadpeaksPE_peak_256	MRS-6	repeat_region
Ca21chr6_C_albicans_SC5314	927169	927405	237	327.87	5.47965	1.28946	3.1576	broadpeaksPE_peak_257	orf19.1075.1-P	CDS
Ca21chr6_C_albicans_SC5314	931476	932266	791	305.41	3.10636	1.20141	1.1311	broadpeaksPE_peak_258	orf19.1078	gene
Ca21chr6_C_albicans_SC5314	950158	950883	726	332.7	6.14954	1.3084	3.78529	broadpeaksPE_peak_259	orf19.1086	gene
Ca21chr6_C_albicans_SC5314	980541	983910	3370	490.11	14.1394	1.41918	11.3794	broadpeaksPE_peak_260	CEN6	centromere
Ca21chr6_C_albicans_SC5314	357527	357776	250	286.03	3.36512	1.22114	1.32733	C_albicans_MACS2_PE_broad_peak_235
Ca21chr6_C_albicans_SC5314	939451	941994	2544	290.6	4.16717	1.25478	1.9874	C_albicans_MACS2_PE_broad_peak_247
Ca21chr6_C_albicans_SC5314	966934	967653	720	290.29	3.44279	1.22288	1.38754	C_albicans_MACS2_PE_broad_peak_249
Ca21chr7_C_albicans_SC5314	130378	130618	241	306.99	3.25003	1.20759	1.24396	broadpeaksPE_peak_262
Ca21chr7_C_albicans_SC5314	140990	141553	564	305.24	3.09178	1.20073	1.1202	broadpeaksPE_peak_263	orf19.7044	gene
Ca21chr7_C_albicans_SC5314	192829	193064	236	356.12	7.45766	1.34001	4.98565	broadpeaksPE_peak_264
Ca21chr7_C_albicans_SC5314	202751	203031	281	308.42	3.26082	1.20742	1.25572	broadpeaksPE_peak_265	orf19.7018	gene
Ca21chr7_C_albicans_SC5314	205129	205931	803	329.97	3.09814	1.193	1.12763	broadpeaksPE_peak_266	orf19.7017-T	mRNA
Ca21chr7_C_albicans_SC5314	228931	229787	857	481.21	10.7763	1.3529	8.16158	broadpeaksPE_peak_267	RB2-7a	repeat_region
Ca21chr7_C_albicans_SC5314	238392	239033	642	758.44	4.61885	1.15429	2.39292	broadpeaksPE_peak_268	MRS-7a	repeat_region
Ca21chr7_C_albicans_SC5314	258800	259084	285	342.5	5.22899	1.27275	2.94865	broadpeaksPE_peak_269	orf19.6906-T	mRNA
Ca21chr7_C_albicans_SC5314	345842	346854	1013	321.89	4.24235	1.24353	2.08124	broadpeaksPE_peak_270	orf19.6565	gene
Ca21chr7_C_albicans_SC5314	363168	364320	1153	324.16	3.97655	1.23181	1.85144	broadpeaksPE_peak_271	orf19.6556	gene
Ca21chr7_C_albicans_SC5314	394788	395814	1027	317.04	3.39356	1.21037	1.36277	broadpeaksPE_peak_272	orf19.6536	gene
Ca21chr7_C_albicans_SC5314	425910	429297	3388	499.7	12.6274	1.37669	9.93546	broadpeaksPE_peak_273	CEN7	centromere
Ca21chr7_C_albicans_SC5314	487872	488746	875	314.04	3.90045	1.23333	1.78132	broadpeaksPE_peak_274	orf19.6489-P	CDS
Ca21chr7_C_albicans_SC5314	587366	589136	1771	470.27	5.7734	1.23924	3.46008	broadpeaksPE_peak_275	MRS-7b	repeat_region
Ca21chr7_C_albicans_SC5314	591463	592031	569	296.82	7.16676	1.08318	4.92388	broadpeaksPE_peak_276
Ca21chr7_C_albicans_SC5314	627236	628051	816	312.59	3.80962	1.22953	1.70969	broadpeaksPE_peak_277	orf19.5171-P	CDS
Ca21chr7_C_albicans_SC5314	691540	692236	697	309.96	3.53104	1.21923	1.47072	broadpeaksPE_peak_278	orf19.5137.1-P	CDS
Ca21chr7_C_albicans_SC5314	710726	711013	288	313.41	3.53162	1.21743	1.47728	broadpeaksPE_peak_279	orf19.5126	gene
Ca21chr7_C_albicans_SC5314	716808	717090	283	324.56	4.04474	1.23531	1.9076	broadpeaksPE_peak_280	orf19.5124	gene
Ca21chr7_C_albicans_SC5314	865871	866661	791	354.61	5.14619	1.26193	2.88546	broadpeaksPE_peak_281	tL(UAA)5-T-E2	exon
Ca21chr7_C_albicans_SC5314	943129	943867	739	481.13	5.13458	1.22498	2.86034	broadpeaksPE_peak_282	orf19.7127-P	CDS
Ca21chr7_C_albicans_SC5314	945555	946458	904	452.77	8.68898	1.31686	6.18895	broadpeaksPE_peak_283
Ca21chr7_C_albicans_SC5314	109963	110200	238	645	17.4895	1.43046	14.5221	NarrowpeaksPE_peak_127
Ca21chr7_C_albicans_SC5314	111227	111613	387	639	12.761	1.35054	9.9872	NarrowpeaksPE_peak_128
Ca21chr7_C_albicans_SC5314	241662	242692	1031	318.02	4.84403	1.26626	2.56167	C_albicans_MACS2_PE_broad_peak_254	MRS-7a	repeat_region
Ca21chr7_C_albicans_SC5314	359413	360865	1453	281.7	3.44789	1.22742	1.38274	C_albicans_MACS2_PE_broad_peak_256
Ca21chr7_C_albicans_SC5314	558503	558936	434	287.67	3.20781	1.21315	1.20186	C_albicans_MACS2_PE_broad_peak_261
Ca21chr7_C_albicans_SC5314	582731	583074	344	1993.29	10.7075	1.15866	8.04378	C_albicans_MACS2_PE_broad_peak_262	MRS-7b	repeat_region
Ca21chr7_C_albicans_SC5314	836646	837374	729	305.7	6.33105	1.33171	3.90179	C_albicans_MACS2_PE_broad_peak_265
Ca21chrR_C_albicans_SC5314	229	1993	1765	466.2	13.8794	1.41879	11.1684	broadpeaksPE_peak_284
Ca21chrR_C_albicans_SC5314	3808	4255	448	554.12	13.0238	1.37587	10.2813	broadpeaksPE_peak_285
Ca21chrR_C_albicans_SC5314	150941	151196	256	356.91	8.79143	1.37741	6.25661	broadpeaksPE_peak_287	orf19.7469-T	mRNA
Ca21chrR_C_albicans_SC5314	165669	166279	611	316.2	3.19404	1.13193	1.21108	broadpeaksPE_peak_288	orf19.7463	gene
Ca21chrR_C_albicans_SC5314	171775	172556	782	354.39	5.18336	1.26268	2.92665	broadpeaksPE_peak_289	orf19.3283	gene
Ca21chrR_C_albicans_SC5314	210935	213042	2108	425.19	4.06818	1.20222	1.93195	broadpeaksPE_peak_290	psi-Rb	long_terminal_repeat
Ca21chrR_C_albicans_SC5314	339430	339701	272	376.69	8.23684	1.3496	5.7256	broadpeaksPE_peak_291	tL(UAA)2-T-E2	exon
Ca21chrR_C_albicans_SC5314	483291	483602	312	311.67	3.49972	1.21711	1.44742	broadpeaksPE_peak_292
Ca21chrR_C_albicans_SC5314	492431	493265	835	314.76	3.80837	1.22952	1.70068	broadpeaksPE_peak_293	orf19.3751	gene
Ca21chrR_C_albicans_SC5314	499980	500253	274	321.44	4.36671	1.25001	2.17473	broadpeaksPE_peak_294	orf19.3746	gene
Ca21chrR_C_albicans_SC5314	511623	512222	600	328.75	3.28289	1.11489	1.27905	broadpeaksPE_peak_295	orf19.3738	gene
Ca21chrR_C_albicans_SC5314	653837	654420	584	330.21	4.89325	1.26669	2.63785	broadpeaksPE_peak_296	orf19.2843	gene
Ca21chrR_C_albicans_SC5314	761357	761793	437	342.28	3.79201	1.21829	1.69541	broadpeaksPE_peak_297
Ca21chrR_C_albicans_SC5314	804370	804688	319	371.41	7.13979	1.32379	4.67966	broadpeaksPE_peak_298
Ca21chrR_C_albicans_SC5314	939349	940425	1077	320.3	3.79332	1.22647	1.6911	broadpeaksPE_peak_299	orf19.506-P	CDS
Ca21chrR_C_albicans_SC5314	945172	945562	391	314.19	3.96554	1.23536	1.84221	broadpeaksPE_peak_300	orf19.510	gene
Ca21chrR_C_albicans_SC5314	946793	949559	2767	323.21	3.86203	1.22808	1.74968	broadpeaksPE_peak_301	orf19.511	gene
Ca21chrR_C_albicans_SC5314	982082	982400	319	347.37	4.72719	1.25249	2.494	broadpeaksPE_peak_302	orf19.535	gene
Ca21chrR_C_albicans_SC5314	1020002	1022185	2184	372.47	5.21528	1.25768	2.94027	broadpeaksPE_peak_303	tS(GCU)2-T-E2	exon
Ca21chrR_C_albicans_SC5314	1029329	1030061	733	304.11	2.99288	1.19631	1.04476	broadpeaksPE_peak_304	orf19.6317	gene
Ca21chrR_C_albicans_SC5314	1036267	1036569	303	314.74	3.85199	1.23122	1.73869	broadpeaksPE_peak_305	orf19.6314	gene
Ca21chrR_C_albicans_SC5314	1095548	1096614	1067	332.12	3.31504	1.20171	1.29957	broadpeaksPE_peak_306	orf19.646	gene
Ca21chrR_C_albicans_SC5314	1098608	1098998	391	316.65	4.01404	1.23648	1.88342	broadpeaksPE_peak_307	tH(GUG)1-T-E1	exon
Ca21chrR_C_albicans_SC5314	1172732	1173676	945	311.59	3.45039	1.21502	1.40711	broadpeaksPE_peak_308	orf19.5851	gene
Ca21chrR_C_albicans_SC5314	1189642	1191314	1673	379.36	7.31181	1.31488	4.89744	broadpeaksPE_peak_309	orf19.5845	gene
Ca21chrR_C_albicans_SC5314	1205635	1206445	811	323.35	3.62998	1.21854	1.55243	broadpeaksPE_peak_310	orf19.6648	gene
Ca21chrR_C_albicans_SC5314	1230039	1230274	236	406.79	8.84343	1.34951	6.3083	broadpeaksPE_peak_311	tP(UGG)4-T-E2	exon
Ca21chrR_C_albicans_SC5314	1234543	1235215	673	388.75	5.13873	1.24804	2.87861	broadpeaksPE_peak_312	tS(AGA)3-T	tRNA
Ca21chrR_C_albicans_SC5314	1347081	1347720	640	539.55	11.168	1.34416	8.51937	broadpeaksPE_peak_313	RB2-R	repeat_region
Ca21chrR_C_albicans_SC5314	1359252	1359662	411	397.94	5.33487	1.25055	3.06078	broadpeaksPE_peak_314	MRS-R	repeat_region
Ca21chrR_C_albicans_SC5314	1472377	1475016	2640	323.37	3.46401	1.21105	1.41986	broadpeaksPE_peak_315	orf19.1844	gene
Ca21chrR_C_albicans_SC5314	1523884	1525166	1283	323.59	3.70051	1.22163	1.61463	broadpeaksPE_peak_316	orf19.2356	gene
Ca21chrR_C_albicans_SC5314	1530128	1531067	940	310.98	3.62859	1.22324	1.54973	broadpeaksPE_peak_317
Ca21chrR_C_albicans_SC5314	1576366	1576714	349	318.05	3.74436	1.22571	1.64691	broadpeaksPE_peak_318	orf19.6147	gene
Ca21chrR_C_albicans_SC5314	1592534	1593151	618	316.89	3.20381	1.20179	1.21184	broadpeaksPE_peak_319	orf19.6137	gene
Ca21chrR_C_albicans_SC5314	1607959	1608450	492	371.36	5.7076	1.27365	3.38893	broadpeaksPE_peak_320	tK(UUU)2	gene
Ca21chrR_C_albicans_SC5314	1648305	1649365	1061	312.79	3.68278	1.22455	1.59972	broadpeaksPE_peak_321
Ca21chrR_C_albicans_SC5314	1657216	1657459	244	351	7.07332	1.3287	4.6476	broadpeaksPE_peak_322	orf19.6286.2-T-E2	exon
Ca21chrR_C_albicans_SC5314	1658867	1659606	740	312.57	3.40599	1.21269	1.37131	broadpeaksPE_peak_323	orf19.6286	gene
Ca21chrR_C_albicans_SC5314	1665177	1665470	294	314.77	3.29957	1.207	1.28761	broadpeaksPE_peak_324	orf19.6282	gene
Ca21chrR_C_albicans_SC5314	1691921	1692362	442	307.64	3.31074	1.21014	1.29242	broadpeaksPE_peak_325
Ca21chrR_C_albicans_SC5314	1699113	1699381	269	318.63	4.11897	1.24082	1.96527	broadpeaksPE_peak_326
Ca21chrR_C_albicans_SC5314	1709221	1711314	2094	328.02	3.75197	1.22137	1.66114	broadpeaksPE_peak_327	orf19.3715	gene
Ca21chrR_C_albicans_SC5314	1722746	1723781	1036	363.68	3.94492	1.21817	1.81454	broadpeaksPE_peak_328	orf19.610-P	CDS
Ca21chrR_C_albicans_SC5314	1743951	1747274	3324	486.24	12.7504	1.40036	10.0191	broadpeaksPE_peak_329	CENR	centromere
Ca21chrR_C_albicans_SC5314	1787008	1787886	879	433.39	5.83731	1.25718	3.49345	broadpeaksPE_peak_330	tK(UUU)3-T-E2	exon
Ca21chrR_C_albicans_SC5314	1813216	1813458	243	420.71	8.06648	1.32369	5.56294	broadpeaksPE_peak_331	tI(AAU)5-T-E1	exon
Ca21chrR_C_albicans_SC5314	1831143	1831392	250	358.9	6.72983	1.31403	4.32073	broadpeaksPE_peak_332	orf19.6415.1	gene
Ca21chrR_C_albicans_SC5314	1884717	1887183	2467	12602.4	228.834	1.32724	224.878	broadpeaksPE_peak_333
Ca21chrR_C_albicans_SC5314	1905509	1905959	451	323.48	3.8962	1.22646	1.7787	broadpeaksPE_peak_335	orf19.7282-P	CDS
Ca21chrR_C_albicans_SC5314	1919637	1920081	445	369.72	6.56016	1.30249	4.17675	broadpeaksPE_peak_336	tM(CAU)4	gene
Ca21chrR_C_albicans_SC5314	1925867	1927029	1163	314.49	3.52892	1.21743	1.47154	broadpeaksPE_peak_337	orf19.7297-P	CDS
Ca21chrR_C_albicans_SC5314	1933092	1933345	254	506.79	6.61276	1.25363	4.23065	broadpeaksPE_peak_338	orf19.7301	gene
Ca21chrR_C_albicans_SC5314	2009003	2010224	1222	338.77	7.24107	1.32492	4.8766	broadpeaksPE_peak_339	tD(GUC)7	gene
Ca21chrR_C_albicans_SC5314	2016424	2016866	443	307	3.24927	1.20763	1.24242	broadpeaksPE_peak_340
Ca21chrR_C_albicans_SC5314	2037145	2038041	897	326.93	3.82007	1.22517	1.71251	broadpeaksPE_peak_341	orf19.6606-P	CDS
Ca21chrR_C_albicans_SC5314	2044960	2045551	592	331.99	4.05284	1.23328	1.90561	broadpeaksPE_peak_342	orf19.6601	gene
Ca21chrR_C_albicans_SC5314	2049179	2050500	1322	354.36	8.0804	1.3441	5.66647	broadpeaksPE_peak_343	tN(GUU)4-T-E1	exon
Ca21chrR_C_albicans_SC5314	2060909	2061828	920	311.65	3.50385	1.21733	1.45052	broadpeaksPE_peak_344	orf19.6594	gene
Ca21chrR_C_albicans_SC5314	2128294	2128774	481	333.15	6.23987	1.30979	3.88121	broadpeaksPE_peak_345	orf19.7569-P	CDS
Ca21chrR_C_albicans_SC5314	2186244	2186723	480	307.98	3.50117	1.19862	1.4849	broadpeaksPE_peak_346	orf19.7599-P	CDS
Ca21chrR_C_albicans_SC5314	2201740	2202091	352	351.68	4.11397	1.2275	1.96433	broadpeaksPE_peak_347	orf19.7609	gene
Ca21chrR_C_albicans_SC5314	2226881	2227211	331	310.46	3.66398	1.20591	1.58338	broadpeaksPE_peak_348	snR13	gene
Ca21chrR_C_albicans_SC5314	5810	6361	552	587	13.5815	1.38481	10.776	NarrowpeaksPE_peak_136
Ca21chrR_C_albicans_SC5314	7033	7496	464	637	15.4981	1.39989	12.6155	NarrowpeaksPE_peak_137
Ca21chrR_C_albicans_SC5314	1888956	1889997	1042	19002	232.518	1.27908	228.396	NarrowpeaksPE_peak_160
Ca21chrR_C_albicans_SC5314	1890292	1890736	445	17242	132.022	1.21226	128.073	NarrowpeaksPE_peak_161
Ca21chrR_C_albicans_SC5314	135369	136354	986	299.04	5.49991	1.3028	3.15887	C_albicans_MACS2_PE_broad_peak_272
Ca21chrR_C_albicans_SC5314	517773	518341	569	287.79	3.08671	1.20727	1.10821	C_albicans_MACS2_PE_broad_peak_278
Ca21chrR_C_albicans_SC5314	954575	955402	828	363.31	4.60728	1.24138	2.35271	C_albicans_MACS2_PE_broad_peak_282
Ca21chrR_C_albicans_SC5314	1004164	1005702	1539	274.2	3.42666	1.12029	1.3875	C_albicans_MACS2_PE_broad_peak_283
Ca21chrR_C_albicans_SC5314	1108180	1108620	441	290.39	3.14287	1.20886	1.15278	C_albicans_MACS2_PE_broad_peak_287
Ca21chrR_C_albicans_SC5314	1110364	1110865	502	289.43	3.99278	1.24879	1.82755	C_albicans_MACS2_PE_broad_peak_288
Ca21chrR_C_albicans_SC5314	1128588	1128845	258	282.52	3.4806	1.22852	1.41078	C_albicans_MACS2_PE_broad_peak_289
Ca21chrR_C_albicans_SC5314	1143991	1144450	460	295.4	3.02147	1.20098	1.05795	C_albicans_MACS2_PE_broad_peak_290
Ca21chrR_C_albicans_SC5314	1998133	1998369	237	277.54	3.05	1.20944	1.07635	C_albicans_MACS2_PE_broad_peak_315
